# Supplementary material for: Analysis of Sensitive CO2 Pathways and Genes Related to Carbon Uptake and Accumulation in Chlamydomonas reinhardtii through Genomic Scale Modeling and Experimental Validation
Source: Front Plant Sci. 2016 Feb 9;7:43. doi: 10.3389/fpls.2016.00043 (PMC4746324; doi:10.3389/fpls.2016.00043)
Supplement: Supplementary file 4 [file Table4.XLSX]

## Sheet: Sensitive genes (our model)
Supplementary table 4. Sensitive routes and genes related to carbon acquisition and accumulation
Transport Reaction				Fluxes (mmol/gDW h)
No. Reaction	Reaction	Description		0.025	0.05	0.08	0.1	Protein	Gene	KEGG reaction no.
R12	[e] : h <==>	H+ exchange		717.871	717.305	708.875	588.64
R47	[e] : for <==>	Formate exchange		699.695	699.128	690.648	570.436
R68	[x] : bhb -->			141.404	140.942	0	0
R98	3pg[c] + pi[h] <==> 3pg[h] + pi[c]	3-Phospho-D-glycerate transport via triose phosphate translocator (from chloroplast)		593.908	593.767	483.797	533.296	2.A.7.9.1;2.A.7.9.2	( (CRv4_Au5.s14.g5515.t1) ) or ( (CRv4_Au5.s15.g5921.t1) ) or ( (CRv4_Au5.s2.g8924.t1) ) or ( (CRv4_Au5.s8.g14736.t1) ) or ( MOT20 (CRv4_Au5.s9.g15789.t1) )
R105	ac[c] <==> ac[h]	acetate transport. chloroplast		564.994	565.3	804.473	696.818
R112	amp[c] <==> amp[h]	AMP transport. chloroplast		1000	1000	0	1000
R116	adp[c] + atp[h] + (3) h[c] --> adp[h] + atp[c] + (3) h[h]	ADP/ATP transporter. chloroplast		578.789	578.643	464.819	516.053	2.A.12.1.2
R118	co2[c] --> co2[h]	CO2 chloroplast transport		455.007	455.409	753.032	627.623
R136	for[h] + h[h] --> for[c] + h[c]	formate transport out via proton symport. chloroplast		159.449	159.291	66.7672	91.3035	2.A.44.2.1	( NAR1.5 (CRv4_Au5.s12.g3889.t1) ) or ( NAR1.2 (CRv4_Au5.s6.g13574.t1) ) or ( NAR1.1 (CRv4_Au5.s9.g15694.t1) )
R140	g6p-A[c] + pi[h] <==> g6p-A[h] + pi[c]	alpha-glucose 6-phosphate:pi antiporter. chloroplast		515.119	515.136	528.668	522.577	2.A.7.9.2	( (CRv4_Au5.s14.g5515.t1) ) or ( (CRv4_Au5.s15.g5921.t1) ) or ( (CRv4_Au5.s2.g8924.t1) ) or ( (CRv4_Au5.s8.g14736.t1) ) or ( MOT20 (CRv4_Au5.s9.g15789.t1) )
R146	glu-L[h] + h[h] --> glu-L[c] + h[c]	Amino acid transporter (glu-L). chloroplast		135.857	135.623	0	35.381	2.A.18.6.6	AOT5 (CRv4_Au5.s6.g12686.t1)
R150	gly[c] + na1[c] <==> gly[h] + na1[h]	Neutral amino acid transporter (gly). chloroplast		604.595	604.991	795.588	785.089	2.A.18.6.4	AOT7 (CRv4_Au5.s2.g9042.t1)
R153	h2o[c] <==> h2o[h]	H2O transport. chloroplast		993.91	993.78	892.217	937.932	1.A.8.11.1	( MIP1 (CRv4_Au5.s12.g4049.t1) ) or ( MIP2 (CRv4_Au5.s17.g7269.t1) )
R154	h2[c] <==> h2[h]	hydrogen transport. chloroplast		395.483	395.409	368.93	363.739
R175	nadp[c] <==> nadp[h]	NADP transport by free diffusion, chloroplast		1000	0	0	0
R177	nh4[c] + h[c] <==> nh4[h] + h[h]	ammonia transport. chloroplast		996.53	996.606	40.4606	29.276
R220	co2[e] <==> co2[c]	CO2 transport. extracellular		3.9418	5.0971	900.097	500.097
R226	for[c] + h[c] --> for[e] + h[e]	formate transport out via proton symport		699.695	699.128	690.648	570.436	2.A.44.2.1	( NAR1.6 (CRv4_Au5.s1.g1213.t1) ) or ( NAR1.3 (CRv4_Au5.s3.g11354.t1) ) or ( NAR1.4 (CRv4_Au5.s7.g14150.t1) )
R307	h[c] + nadh[c] <==> h[x] + nadh[x]	NADH transport. glyoxysome		141.404	140.942	1000	1000
R313	acac[c] <==> acac[x]	Acetoacetate transport via diffusion. glyoxysome		141.404	140.942	1000	1000
R336	2pg[c] <==> 2pg[m]	glycerate transport. mitochondria		126.84	126.991	245.312	192.054
R337	34hpp[c] + h[c] <==> 34hpp[m] + h[m]	3-(4-hydroxyphenyl)pyruvate mitochondrial transport via proton symport		724.019	724.073	179.783	117.742
R345	accoa[c] + coa[m] <==> accoa[m] + coa[c]	Acetyl-CoA:CoA antiporter. mitochondrial		576.192	576.83	343.369	622.368	2.A.1.25.1	FBB13 (CRv4_Au5.s7.g14228.t1)
R350	akg[c] + cit[m] <==> akg[m] + cit[c]	Dicarboxylate/tricarboxylate carrier (akg:cit). mitochondrial		732.805	732.781	0	170.271	2.A.29.2.6	MITC14 (CRv4_Au5.s16.g6506.t1)
R362	asp-L[c] + na1[c] <==> asp-L[m] + na1[m]	Aspartate:Na+ symporter. mitochondrial		553.634	553.861	725.778	651.247	2.A.23.2.2
R373	mal-L[c] + succ[m] <==> mal-L[m] + succ[c]	dicarboxylate transport. mitochondrial		1000	1000	87.6659	124.404
R380	for[m] + h[m] --> for[c] + h[c]	formate transport out via proton symport. mitochondrial		581.441	581.032	663.925	519.695	2.A.44.2.1	( NAR1.6 (CRv4_Au5.s1.g1213.t1) ) or ( NAR1.3 (CRv4_Au5.s3.g11354.t1) ) or ( NAR1.4 (CRv4_Au5.s7.g14150.t1) )
R391	h2o[c] <==> h2o[m]	H2O transport. mitochondrial		0	0	0	0		( MIP1 (CRv4_Au5.s12.g4049.t1) ) or ( MIP2 (CRv4_Au5.s17.g7269.t1) )
R399	mal-L[c] + akg[m] <==> mal-L[m] + akg[c]	Dicarboxylate/tricarboxylate carrier (mal:akg). mitochondrial		1000	1000	0	0	2.A.29.2.6	MITC14 (CRv4_Au5.s16.g6506.t1)
R409	nadh[c] --> nadh[m]	nadh transport. mitochondrial		183.142	184.312	0	526.529
R411	nh4[c] + h[c] <==> nh4[m] + h[m]	ammonia transport. mitochondria		962.228	962.153	919.45	930.116
R430	ser-L[c] + na1[c] <==> ser-L[m] + na1[m]	Neutral amino acid transporter (ser-L). mitochondrial		8.30756	8.23114	0	0	2.A.18.6.4	AOT7 (CRv4_Au5.s2.g9042.t1)
R437	thr-L[c] + na1[c] <==> thr-L[m] + na1[m]	Neutral amino acid transporter (thr-L). mitochondrial		1000	1000	613.39	604.793	2.A.18.6.4	AOT7 (CRv4_Au5.s2.g9042.t1)
R440	tyr-L[c] + h[c] <==> tyr-L[m] + h[m]	Tyrosine permease. mitochondrial		1000	1000	0	0	2.A.42.1.1;2.A.18.5.2	(CRv4_Au5.s13.g4507.t1)
R487	[h] : akg + asp-L <==> glu-L + oaa	aspartate aminotransferase. chloroplast		220.348	220.111	82.1308	118.573	2.6.1.1	( AST3 (CRv4_Au5.s2.g8757.t1) ) or ( AST1 (CRv4_Au5.s2.g9246.t1) )	R00355
R612	[c] : 3hbcoa <==> b2coa + h2o	3-Hydroxybutanoyl-CoA hydro-lyase		345.878	345.865	847.86	511.43	4.2.1.17;5.3.3.8	( (CRv4_Au5.s16.g6952.t1) ) or ( (CRv4_Au5.s2.g8635.t1) )	R03026
R620	[x] : bhb + nad <==> acac + nadh + h	3-Hydroxybutanoate:NAD+ oxidoreductase. glyoxysome		858.596	859.058	1000	1000	1.1.1.30	(CRv4_Au5.s7.g14479.t1)	R01361
R629	[h] : h + nadph + oaa --> mal-L + nadp	malate dehydrogenase (NADP+)		21.8292	21.599	0	0	1.1.1.82	MDH5 (CRv4_Au5.s9.g15688.t1)	R00343
R637	[h] : mal-L + nadp <==> co2 + nadph + pyr	malate dehydrogenase (oxaloacetate decarboxylating) (NADP+)		220.348	220.111	82.1308	118.573	1.1.1.40	( MME3 (CRv4_Au5.s14.g5651.t1) ) or ( MME2 (CRv4_Au5.s14.g5652.t1) ) or ( MME6 (CRv4_Au5.s6.g12423.t1) )	R00216
R1359	[h] : thr-L <==> gly + acald	threonine aldolase		825.669	825.828	918.767	894.044	4.1.2.5	(CRv4_Au5.s10.g124.t2)	R00751
R1360	[h] : ser-L <==> pyr + nh4	threonine ammonia-lyase (serine)		879.752	879.833	927.505	914.602	4.3.1.19	THD1 (CRv4_Au5.s2.g8272.t1)	R00220
R1388	[c] : g1p <==> g6p-A	phosphoglucomutase		570.848	570.864	582.841	577.45	5.4.2.2	( GPM2 (CRv4_Au5.s1.g1224.t1) ) or ( GPM1B (CRv4_Au5.s13.g5035.t2) )	R00959
R1390	[h] : g6p-A <==> f6p-B	glucose-6-phosphate isomerase. chloroplast (g6p-A)		515.119	515.136	528.668	522.577	5.3.1.9	PGI1 (CRv4_Au5.s3.g10657.t3)	R02740
R1398	[h] : pyr + thmpp + h --> 2ahethmpp + co2	pyruvate dehydrogenase (acetyl-transferring)		178.473	178.314	85.2595	110.035	1.2.4.1;2.2.1.6;4.1.1.1	( PDC2 (CRv4_Au5.s2.g8797.t1) and PDH2 (CRv4_Au5.s3.g11028.t1) ) or ( ALSS1 (CRv4_Au5.s23.g9893.t1) and ALSL1 (CRv4_Au5.s29.g10106.t1) )	R00014
R1411	[m] : adp + h + pep --> atp + pyr	pyruvate kinase. mitochondrial		126.563	126.715	245.044	191.783	2.7.1.40	( PYK1 (CRv4_Au5.s12.g3734.t1) ) or ( PYK5 (CRv4_Au5.s2.g9759.t1) )	R00200
R1412	[h] : dhap <==> g3p	triosephosphate isomerase		52.0091	52.1268	143.791	102.531	5.3.1.1	TPIC (CRv4_Au5.s1.g1557.t1)	R01015
R1413	[h] : 2ahethmpp --> acald + thmpp	Pyruvate decarboxylase. chloroplast		174.331	174.172	81.233	105.956	4.1.1.1		R00755
R1415	[m] : 2ahethmpp --> acald + thmpp	Pyruvate decarboxylase		148.114	147.641	1000	1000	1.8.1.4	DLDH1 (CRv4_Au5.s31.g11386.t1)	R07618
R1570	[m] : mlthf + nh4 + co2 + nadh --> gly + thf + nad	glycine synthase		962.228	962.153	919.45	930.116	2.1.2.10	( IBA57 (CRv4_Au5.s10.g816.t1) and CGL77 (CRv4_Au5.s12.g4121.t1) ) or ( IBA57 (CRv4_Au5.s10.g816.t1) and GCST (CRv4_Au5.s3.g11019.t1) )	R01221
R1624	[h] : h2o + ppi --> (2) pi	Inorganic diphosphatase		272.169	272.039	171.328	216.66	3.6.1.1	( IPY1 (CRv4_Au5.s10.g135.t1) ) or ( IPY3 (CRv4_Au5.s2.g9250.t1) ) or ( (CRv4_Au5.s2.g9408.t1) )	R00004
R1626	[m] : h + nadh + q8 --> nad + q8h2	NADH:ubiquinone oxidoreductase Complex I		551.595	551.985	526.794	605.129	1.6.5.3	NDA2 (CRv4_Au5.s33.g11431.t1) or NDA3 (CRv4_Au5.s5.g11988.t1) or ( NUO10 (CRv4_Au5.s12.g2920.t1) and NUO11 (CRv4_Au5.s2.g9603.t1) and NUO13 (CRv4_Au5.s22.g9803.t1) and NUO21 (CRv4_Au5.s6.g12740.t1) and NUO3 (CRv4_Au5.s8.g15041.t1) and NUO5 (CRv4_Au5.s10.g647.t1) and NUO6 (CRv4_Au5.s10.g104.t1) and NUO8 (CRv4_Au5.s12.g3008.t1) and NUO9 (CRv4_Au5.s7.g13986.t1) and NUOA8 (CRv4_Au5.s7.g14116.t1) and …	R02163
R1662	[h] : ru5p-D <==> xu5p-D	D-Ribulose-5-Phosphate 3-Epimerase		132.569	132.523	96.3588	112.637	5.1.3.1	RPE1 (CRv4_Au5.s12.g3309.t1)	R01529
R1663	[h] : r5p <==> ru5p-D	ribose-5-phosphate isomerase		132.569	132.523	96.3588	112.637	5.3.1.6	RPI1 (CRv4_Au5.s3.g10896.t1)	R01056
R1665	[h] : e4p + xu5p-D <==> f6p-B + g3p	transketolase 2		309.961	309.867	236.288	269.407	2.2.1.1	TRK1 (CRv4_Au5.s2.g8409.t1)	R01830
R1691	[m] : 34hpp + glu-L <==> tyr-L + akg	tyrosine transaminase. mitochondria		0	0	1000	1000	2.6.1.1;2.6.1.5;2.6.1.9	( HIS5 (CRv4_Au5.s1.g2264.t1) ) or ( AST3 (CRv4_Au5.s2.g8757.t1) ) or ( AST1 (CRv4_Au5.s2.g9246.t1) ) or ( AST4 (CRv4_Au5.s6.g12556.t1) )	R00734
R1775	[h] : 2obut + coa --> ppcoa + for	propanoyl-CoA:formate C-propanoyltransferase. chloroplast		159.449	159.291	66.7672	91.3035	2.3.1.54	PFL1 (CRv4_Au5.s1.g1862.t1)	R06987
R1968	[c] : (2) accoa --> aacoa + coa	Acetyl-CoA C-acetyltransferase		190.994	190.53	48.2039	48.8268	2.3.1.9	(CRv4_Au5.s2.g9723.t1)	R00238
R1995	[m] : coa + pyr --> accoa + for	Formate C-acetyltransferase. mitochondrial		581.441	581.032	663.925	519.695	2.3.1.54	PFL1 (CRv4_Au5.s1.g1862.t1)	R00212
R1997	[h] : accoa + pi <==> actp + coa	phosphotransacetylase		849.991	849.83	724.655	780.998	2.3.1.8	( PAT1 (CRv4_Au5.s17.g7027.t1) ) or ( PAT2 (CRv4_Au5.s9.g15405.t1) )	R00230
R2001	[h] : (2) fdxrd <==> (2) fdxox + h2 + (2) h	(FeFe)-hydrogenase. chloroplast		604.517	604.591	631.07	636.261	1.12.7.2	( HYDA1 (CRv4_Au5.s3.g11137.t1) and FDX2 (CRv4_Au5.s16.g6229.t1) ) or ( HYDA1 (CRv4_Au5.s3.g11137.t1) and FDX5 (CRv4_Au5.s17.g7064.t1) ) or ( HYDA1 (CRv4_Au5.s3.g11137.t1) and FDX6 (CRv4_Au5.s3.g10824.t1) ) or ( HYDA1 (CRv4_Au5.s3.g11137.t1) and FDX3 (CRv4_Au5.s6.g13523.t1) ) or ( HYDA1 (CRv4_Au5.s3.g11137.t1) and FDX4 (CRv4_Au5.s7.g14133.t1) ) or ( HYDA2 (CRv4_Au5.s9.g15404.t1) and FDX2 (CRv4_Au…	R00019
R2089	[c] : cit <==> icit	aconitate hydratase		732.805	732.781	1000	170.271			R01324
R2092	[m] : akg + h + lpam --> co2 + sdhlam	2-oxoglutarate dehydrogenase E1 component		55.2981	55.076	0	0	1.2.4.2	OGD1 (CRv4_Au5.s12.g3808.t1)	R01700
R2104	[m] : cit <==> icit	Aconitate hydratase. mitochondrial		0	0	1000	1000	4.2.1.3	ACH1 (CRv4_Au5.s1.g1822.t1)	R01324
R2106	[c] : icit + nadp <==> akg + co2 + nadph	isocitrate dehydrogenase (NADP)		186.153	186.547	0	184.547	1.1.1.42	IDH3 (CRv4_Au5.s4.g11563.t1)	R00267
R2109	[m] : succ + q8 <==> fum + q8h2	succinate dehydrogenase (ubiquinone)		469.795	469.404	493.998	415.932	1.3.5.1	( SDH1 (CRv4_Au5.s14.g5444.t1) and SDH2 (CRv4_Au5.s6.g12681.t1) )	R02164
R2143	[h] : thr-L --> 2obut + nh4	threonine ammonia-lyase		163.898	163.74	71.092	95.6842	4.3.1.19	THD1 (CRv4_Au5.s2.g8272.t1)	R00996
R2149	[m] : coa + 2mpdhl --> ibcoa + dhlam	dihydrolipoyllysine-residue (2-methylpropanoyl)transferase. Isobutyryl-CoA forming		92.8163	92.5647	0	0	2.3.1.168	(CRv4_Au5.s4.g11844.t1)	R02662
R2165	[m] : 3mob + thmpp + h --> 2mhop + co2	3-methyl-2-oxobutanoate dehydrogenase		92.8163	92.5647	0	0	1.2.4.4	( (CRv4_Au5.s12.g3863.t1) and (CRv4_Au5.s6.g13618.t1) )	R07599
R2167	[m] : 2mhop + lpam --> 2mpdhl + thmpp	3-methyl-2-oxobutanoate dehydrogenase. 2-Methyl-1-hydroxypropyl-ThPP transforming		92.8163	92.5647	0	0	1.2.4.4	( (CRv4_Au5.s12.g3863.t1) and (CRv4_Au5.s6.g13618.t1) )
R2203	[e] : co2 <==>	CO2 exchange		3.9418	5.0971	900.097	500.097
R2250	accoa[c] + coa[h] <==> accoa[h] + coa[c]	Acetyl-CoA:CoA antiporter. chloroplast		134.16	134.321	259.939	203.397	2.A.1.25.1	FBB13 (CRv4_Au5.s7.g14228.t1)
R2254	akg[c] + mal-L[h] <==> akg[h] + mal-L[c]	aKG/malate antiport		783.947	784.184	859.815	885.656	2.A.47.3.1	OMT1 (CRv4_Au5.s17.g7311.t1)
R2258	amp[c] <==> amp[h]	AMP transport. chloroplast		1000	1000	3.94e-13	1000
R2259	asp-L[c] + na1[c] <==> asp-L[h] + na1[h]	Aspartate:Na+ symporter. chloroplast		777.35	777.587	916	879.161	2.A.23.2.2	DAT1 (CRv4_Au5.s10.g767.t1)
R2263	coa[c] <==> coa[h]	CoA transporter. chloroplast		840.551	840.71	933.233	908.697
R2286	gly[c] + h[c] <==> gly[h] + h[h]	Amino acid transporter (gly). chloroplast		430.264	430.82	714.355	679.133	2.A.3.3.3	( AOC6 (CRv4_Au5.s1.g1788.t1) ) or ( AOC5 (CRv4_Au5.s7.g14019.t1) )
R2298	mal-L[c] + na1[c] <==> mal-L[h] + na1[h]	L-malate transport to chloroplast by sodium-ion symport		783.947	784.184	859.815	885.656
R2305	nadp[c] <==> nadp[h]	NADP transport by free diffusion, chloroplast		1000	0	0	0
R2314	ppcoa[c] <==> ppcoa[h]	propanoyl-CoA transport. chloroplast		159.449	159.291	66.7672	91.3035
R2320	ser-L[c] + na1[c] <==> ser-L[h] + na1[h]	Neutral amino acid transporter (ser-L). chloroplast		22.8649	22.7879	0	0	2.A.18.6.4	AOT7 (CRv4_Au5.s2.g9042.t1)
R2402	nad[x] <==> nad[c]	nad transport. glycosomal		858.596	859.058	1000	1000
R2431	34hpp[c] + h[c] <==> 34hpp[m] + h[m]	3-(4-hydroxyphenyl)pyruvate mitochondrial transport via proton symport		1000	1000	0	0
R2439	ac[c] <==> ac[m]	acetate transport. mitochondrial		418.004	417.859	12.4913	241.988
R2445	ala-L[c] + na1[c] <==> ala-L[m] + na1[m]	Neutral amino acid transporter (ala-L). mitochondrial		840.056	840.044	878.074	834.825	2.A.18.6.4	AOT7 (CRv4_Au5.s2.g9042.t1)
R2458	co2[c] <==> co2[m]	CO2 transport. mitochondrial		559.425	558.887	97.4652	260.963
R2459	coa[c] <==> coa[m]	CoA transporter		439.452	439.283	850.592	537.872
R2464	mal-L[c] + succ[m] <==> mal-L[m] + succ[c]	dicarboxylate transport. mitochondrial		1000	1000	0	0
R2472	glu-L[c] + na1[c] <==> glu-L[m] + na1[m]	Glutamate:Na+ symporter. mitochondrial		792.702	792.877	510.113	497.161	2.A.23.2.2	DAT1 (CRv4_Au5.s10.g767.t1)
R2475	gly[c] + na1[c] <==> gly[m] + na1[m]	Neutral amino acid transporter (gly). mitochondrial		208.761	208.601	114.701	139.857	2.A.18.6.4	AOT7 (CRv4_Au5.s2.g9042.t1)
R2479	h2o[c] <==> h2o[m]	H2O transport. mitochondrial		2.04602	2.93484	178.181	604.558	1.A.8.11.1	( MIP1 (CRv4_Au5.s12.g4049.t1) ) or ( MIP2 (CRv4_Au5.s17.g7269.t1) )
R2480	h2[c] <==> h2[m]	hydrogen transport. mitochondria		907.184	907.435	481.517	902.939
R2486	mal-L[c] + akg[m] <==> mal-L[m] + akg[c]	Dicarboxylate/tricarboxylate carrier (mal:akg). mitochondrial		1000	1000	87.6659	124.404	2.A.29.2.6	MITC14 (CRv4_Au5.s16.g6506.t1)
R2495	nad[c] <==> nad[m]	nad transport. mitochondrial		183.142	184.312	1000	526.529
R2504	pi[c] + na1[c] <==> pi[m] + na1[m]	Pi:Na+ symporter. mitochondrial		704.899	705.048	821.19	768.913	2.A.20.2.1;2.A.20.2.3	( PTB8 (CRv4_Au5.s1.g2299.t1) ) or ( PTB7 (CRv4_Au5.s12.g2868.t1) ) or ( PTB1 (CRv4_Au5.s12.g2906.t1) ) or ( PTB12 (CRv4_Au5.s2.g9693.t1) ) or ( PTB4 (CRv4_Au5.s2.g9695.t1) ) or ( PTB3 (CRv4_Au5.s26.g9996.t1) ) or ( PTB2 (CRv4_Au5.s26.g9997.t1) )
R2509	ppcoa[c] <==> ppcoa[m]	propanoyl-CoA transport. mitochondria		856.836	856.995	949.063	924.732
R2512	pyr[c] <==> pyr[m]	pyruvate transport by free diffusion. mitochondrial		315.508	315.532	157.867	201.58
R2518	fum[m] + succ[c] <==> fum[c] + succ[m]	Succinate/fumarate antiporter. mitochondrial		1000	1000	912.334	875.596	2.A.29.13.1	MITC18 (CRv4_Au5.s6.g12602.t1)
R2521	thr-L[c] + h[c] <==> thr-L[m] + h[m]	Amino acid transporter (thr-L). mitochondrial		1000	1000	613.39	604.793	2.A.3.3.3	( AOC6 (CRv4_Au5.s1.g1788.t1) ) or ( AOC5 (CRv4_Au5.s7.g14019.t1) )
R2522	tyr-L[c] + h[c] <==> tyr-L[m] + h[m]	Tyrosine permease. mitochondrial		724.019	724.073	179.783	117.742	2.A.42.1.1;2.A.18.5.2	(CRv4_Au5.s13.g4507.t1)
R2603	[c] : aacoa + nadph + h <==> 3hbcoa + nadp	3-Hydroxybutanoyl-CoA:NADP+ oxidoreductase		654.122	654.135	152.14	488.57	1.1.1.157	(CRv4_Au5.s12.g3750.t1)	R01976
R2607	[c] : akg + ala-L <==> glu-L + pyr	alanine aminotransferase		531.798	532.111	289.784	462.49	2.6.1.2	( AAT1 (CRv4_Au5.s10.g680.t1) ) or ( AAT2 (CRv4_Au5.s6.g13094.t1) )	R00258
R2610	[m] : akg + asp-L <==> glu-L + oaa	aspartate aminotransferase. mitochondrial		483.279	483.05	310.104	385.098	2.6.1.1	( AST3 (CRv4_Au5.s2.g8757.t1) ) or ( AST1 (CRv4_Au5.s2.g9246.t1) ) or ( AST4 (CRv4_Au5.s6.g12556.t1) )	R00355
R2700	[m] : mlthf + gly + h2o <==> thf + ser-L	glycine hydroxymethyltransferase		971.395	971.32	928.36	939.142	2.1.2.1	SHMT3 (CRv4_Au5.s9.g15712.t1)	R00945
R2710	[m] : 2pg <==> h2o + pep	enolase. mitochondria		873.16	873.009	754.688	807.946	4.2.1.11	PGH1 (CRv4_Au5.s12.g3334.t1)	R00658
R2712	[h] : fdp-B <==> dhap + g3p	fructose-bisphosphate aldolase		937.328	937.211	845.844	886.97	4.1.2.13	( FBA1 (CRv4_Au5.s1.g1108.t1) ) or ( FBA2 (CRv4_Au5.s2.g8669.t1) )	R01068
R2717	[h] : g3p + nad + pi <==> 13dpg + h + nadh	glyceraldehyde 3-phosphate dehydrogenase (NAD)		593.908	593.767	483.797	533.296	1.2.1.12	( GAP3 (CRv4_Au5.s1.g1191.t1) and GAP1 (CRv4_Au5.s12.g2782.t1) )	R01061
R2724	[c] : 3pg <==> 2pg	phosphoglycerate mutase		593.908	593.767	483.797	533.296	5.4.2.1	( PGM2 (CRv4_Au5.s10.g840.t1) ) or ( (CRv4_Au5.s12.g3446.t1) ) or ( (CRv4_Au5.s12.g3612.t1) ) or ( PGM5 (CRv4_Au5.s3.g10489.t1) ) or ( (CRv4_Au5.s3.g10792.t1) ) or ( PGM1B (CRv4_Au5.s6.g12839.t2) )	R01518
R2733	[h] : 13dpg + adp <==> 3pg + atp	phosphoglycerate kinase. chloroplast		593.908	593.767	483.797	533.296	2.7.2.3	PGK1 (CRv4_Au5.s22.g9800.t1)	R01512
R2770	[h] : g3p + s7p <==> e4p + f6p-B	transaldolase		762.408	762.214	610.801	678.954	2.2.1.2	TAL1 (CRv4_Au5.s1.g1622.t1)	R01827
R2773	[h] : r5p + xu5p-D <==> g3p + s7p	transketolase 1		177.392	177.344	139.93	156.77	2.2.1.1	TRK1 (CRv4_Au5.s2.g8409.t1)	R01641
R2783	[c] : 34hpp + glu-L <==> tyr-L + akg	tyrosine transaminase		0	0	1000	1000	2.6.1.1;2.6.1.5;2.6.1.9	( HIS5 (CRv4_Au5.s1.g2264.t1) ) or ( AST3 (CRv4_Au5.s2.g8757.t1) ) or ( AST1 (CRv4_Au5.s2.g9246.t1) )	R00734
R2785	[m] : 34hpp + glu-L <==> tyr-L + akg	tyrosine transaminase. mitochondria		275.981	275.927	820.217	882.258	2.6.1.1;2.6.1.5;2.6.1.9	( HIS5 (CRv4_Au5.s1.g2264.t1) ) or ( AST3 (CRv4_Au5.s2.g8757.t1) ) or ( AST1 (CRv4_Au5.s2.g9246.t1) ) or ( AST4 (CRv4_Au5.s6.g12556.t1) )	R00734
R2839	[h] : ac + atp <==> actp + adp	acetate kinase. chloroplast		435.006	434.7	195.527	303.182	2.7.2.1	( ACK2 (CRv4_Au5.s17.g7241.t1) ) or ( ACK1 (CRv4_Au5.s9.g15407.t1) )	R00315
R2840	[m] : ac + atp <==> actp + adp	acetate kinase. mitochondrial		879.295	879.534	736.734	868.006			R00315
R2847	[m] : accoa + pi <==> actp + coa	phosphotransacetylase. mitochondrial		120.705	120.466	263.266	131.994	2.3.1.8	( PAT1 (CRv4_Au5.s17.g7027.t1) ) or ( PAT2 (CRv4_Au5.s9.g15405.t1) )	R00230
R2849	[c] : (2) fdxrd <==> (2) fdxox + h2 + (2) h	(FeFe)-hydrogenase. cytoplasm		962.848	963.192	991.68	134.791	1.12.7.2	( HYDA1 (CRv4_Au5.s3.g11137.t1) and (CRv4_Au5.s1.g1092.t1) ) or ( HYDA1 (CRv4_Au5.s3.g11137.t1) and (CRv4_Au5.s12.g2838.t1) ) or ( HYDA1 (CRv4_Au5.s3.g11137.t1) and (CRv4_Au5.s6.g13230.t1) ) or ( HYDA2 (CRv4_Au5.s9.g15404.t1) and (CRv4_Au5.s1.g1092.t1) ) or ( HYDA2 (CRv4_Au5.s9.g15404.t1) and (CRv4_Au5.s12.g2838.t1) ) or ( HYDA2 (CRv4_Au5.s9.g15404.t1) and (CRv4_Au5.s6.g13230.t1) )	R00019
R2850	[m] : (2) fdxrd <==> (2) fdxox + h2 + (2) h	(FeFe)-hydrogenase. mitochondria		92.8163	92.5647	518.483	97.0611	1.12.7.2	( HYDA1 (CRv4_Au5.s3.g11137.t1) and MFDX (CRv4_Au5.s12.g4262.t1) ) or ( HYDA2 (CRv4_Au5.s9.g15404.t1) and MFDX (CRv4_Au5.s12.g4262.t1) )	R00019
R2866	[m] : coa + sdhlam + h <==> dhlam + succoa	2-oxoglutarate dehydrogenase E2 component		944.702	944.924	1000	1000	2.3.1.61		R02570
R2873	[m] : cit <==> icit	Aconitate hydratase. mitochondrial		271.514	271.106	275.758	544.252	4.2.1.3	ACH1 (CRv4_Au5.s1.g1822.t1)	R01324
R2877	[m] : atp + coa + succ + h <==> adp + pi + succoa	succinyl-CoA ligase (ADP-forming)		490.944	490.554	515.115	437.063			R00405
R2880	[c] : tyr-L + akg <==> 34hpp + glu-L	L-tyrosine:2-oxoglutarate aminotransferase		275.981	275.927	820.217	882.258	2.6.1.1	( AST3 (CRv4_Au5.s2.g8757.t1) ) or ( AST1 (CRv4_Au5.s2.g9246.t1) )	R00734
R2976	[c] : h + nadh + co2 + pyr --> nad + Dmala	Isocitrate/isopropylmalate dehydrogenase		118.59	118.604	0	0		Cre07.g325400.t1.2	R00215
R2978	[m] : h + nadh + co2 + pyr --> nad + Dmala	Isocitrate/isopropylmalate dehydrogenase		530.205	530.596	593.668	708.473		Cre02.g143250.t1.2	R00215
R2980	[c] : Dmala --> maleiaci + h2o	(R)-Malate hydro-lyase		118.59	118.604	0	0	4.2.1.31		R02419
R2982	[m] : Dmala --> maleiaci + h2o	(R)-Malate hydro-lyase		530.205	530.596	593.668	708.473	4.2.1.31		R02419
R2984	[c] : maleiaci --> fum	Maleate cis-trans-isomerase		118.59	118.604	0	0	5.2.1.1		R01087
R2986	[m] : maleiaci --> fum	Maleate cis-trans-isomerase		530.205	530.596	593.668	708.473	5.2.1.1		R01087
R3020	[c] : h2 + nad --> nadh + h	hydrogen:NAD+ oxidoreductase		548.852	548.834	120.907	404.409	1.12.1.2		R00700
R3060	[h] : fdxrd + nad --> fdxox + nadh + h	Ferredoxin:NAD oxidoreductase		803.538	803.389	750.079	739.855	1.18.1.3	Cre06.g271200.t1.2	R05875
R3097	[m] : h + co2 + (2) fdxrd + ibcoa --> (2) fdxox + coa + 3mob	3-methyl-2-oxobutanoate:ferredoxin oxidoreductase		92.8163	92.5647	1000	1000	1.2.7.7	g1910.t1	R07160
R3141	[c] : glu-L + (2) fdxox + h2o --> ammo + akg + (2) fdxrd + (2) h			198.159	197.82	508.32	255.984	1.12.7.2	( HYDA1 (CRv4_Au5.s3.g11137.t1) and (CRv4_Au5.s1.g1092.t1) ) or ( HYDA1 (CRv4_Au5.s3.g11137.t1) and (CRv4_Au5.s12.g2838.t1) ) or ( HYDA1 (CRv4_Au5.s3.g11137.t1) and (CRv4_Au5.s6.g13230.t1) ) or ( HYDA2 (CRv4_Au5.s9.g15404.t1) and (CRv4_Au5.s1.g1092.t1) ) or ( HYDA2 (CRv4_Au5.s9.g15404.t1) and (CRv4_Au5.s12.g2838.t1) ) or ( HYDA2 (CRv4_Au5.s9.g15404.t1) and (CRv4_Au5.s6.g13230.t1) )	R10086
R3218	[m] : oaa + ppcoa --> pyr + smetmalocoa	(S)-2-Methyl-3-oxopropanoyl-CoA:pyruvate carboxyltransferase		139.358	139.2	47.2373	71.5212	2.1.3.1	Cre06.g258700.t1.3	R00930
R3229	[h] : s7p + g3p --> e4p + dfruc6phos	sedoheptulose-7-phosphate:D-glyceraldehyde-3-phosphate glyceronetransferase		585.016	584.869	470.872	522.183	2.2.1.2	Cre01.g032650.t1.2	R08575
R3231	[h] : dfruc6phos + pi --> actp + e4p + h2o	D-fructose-6-phosphate D-erythrose-4-phosphate-lyase		585.016	584.869	470.872	522.183	4.1.2.22		R00761
R3257	[c] : sucr + pi --> dfruct + g1p	sucrose:phosphate alpha-D-glucosyltransferase		660.518	660.53	670.005	665.74	2.4.1.7		R00803
R3322	[h] : ppi + f6p-B --> pi + fdp-B	diphosphate:beta-D-fructose-6-phosphate 1-phosphotransferase		62.672	62.7893	154.156	113.03	2.7.1.90	Cre12.g553250.t1.2	R02073
R3361	[c] : aacoa + ac --> acac + accoa	Acetoacetyl-CoA:acetate CoA-transferase		845.116	844.665	200.344	537.397	2.8.3.8		R01359
R3577	[c] : tag1801819Z1819Z + h2o --> 12dgr1819Z1619Zocta + ocdca	triacylglycerol lipase		461.292	461.675	724.242	626.019	3.1.1.3		R01369
R3585	[c] : tag18111Z18111Z1845Z9Z12Z15Z + h2o --> 12dgr1845Z9Z12Z15Z18111Z + ocdcea	triacylglycerol lipase		630.581	630.16	81.5833	68.3613	3.1.1.3		R01369
R3587	[c] : tag18111Z1819Z180 + h2o --> 12dgr1801819Z + ocdcea	triacylglycerol lipase		369.419	369.84	918.417	931.639	3.1.1.3		R01369
R3597	[c] : tag1819Z18111Z1845Z9Z12Z15Z + h2o --> 12dgr1845Z9Z12Z15Z18111Z + ocdce9a	triacylglycerol lipase		369.419	369.84	918.417	931.639	3.1.1.3		R01369
R3636	[c] : ala-L --> ala-D	alanine racemase		115.195	115.172	144.965	105.424	5.1.1.1		R00401
R3640	[m] : ala-D --> ala-L	alanine racemase		115.195	115.172	144.965	105.424	5.1.1.1		R00401
R3665	[c]: glu-D --> glu-L	glutamate racemase		115.195	115.172	144.965	105.424	5.1.1.3		R00260
R3734	[m] : succoa --> rmetmacoa	R)-Methylmalonyl-CoA CoA-carbonylmutase		860.642	860.8	952.763	928.479	5.4.99.2		R00833
R3836	[c] : h + nadh + ammo + pyr --> h2o + nad + ala-L	L-Alanine:NAD+ oxidoreductase		766.891	766.566	1000	831.297	1.4.1.1		R00396
R3890	[c] : udpg + dfructo --> udp + sucr	UDP-glucose:D-fructose 2-alpha-D-glucosyltransferase		660.518	660.53	670.005	665.74	2.4.1.13	Cre12.g524000.t1.2	R00806
R3919	[c] : akg + ala-D --> glu-D + pyr	D-Alanine:2-oxoglutarate aminotransferase		115.195	115.172	144.965	105.424	2.6.1.21	Cre10.g458050.t1.2	R01148
R3921	[m] : akg + ala-D --> glu-D + pyr	D-Alanine:2-oxoglutarate aminotransferase		884.805	884.828	855.035	894.576	2.6.1.21	Cre10.g458050.t1.2	R01148
R4027	[c] : ammo --> fum + asp-L	L-aspartate ammonia-lyase		833.142	833.131	865.415	828.071	4.3.1.1	Cre08.g385400.t1.2	R00490
R4048	[m] : smetmalocoa --> rmetmacoa	Methylmalonyl-CoA epimerase		139.358	139.2	47.2373	71.5212	5.1.99.1	Cre10.g466500.t1.2	R02765
R4073	[c] : nad + tryp --> h + nadh + in3acede	indole-3-ethanol:NAD+ oxidoreductase		808.513	808.921	73.7458	641.843	1.1.1.190		R02679
R4077	[c] : nadp + tryp --> h + nadph + in3acede	indole-3-ethanol:NADP+ oxidoreductase		191.487	191.079	926.254	358.157	1.1.1.191		R02680
R4166	[c] : penicillin + akg + o2 --> deacephac + succ + co2 + h2o	Penicillin and cephalosporin biosynthesis		173.5	174.096	242.175	315.599
R4168	[c] : deacephac + succ + co2 + h2o --> penicillin + akg + o2	Penicillin and cephalosporin biosynthesis		173.5	174.096	242.175	315.599
Sensitive reactions ( ρ≥0.01) are presented with fluxes (mmol gDW-1 h-1) evaluated at different CO2 conditions. Protein-gene association and KEGG reaction number [1] are also shown for each reaction. More information about genes can be searched in Phytozome or NCBI databases.

## Sheet: Sensitive genes (Chang´s model)
Supplementary table 4. Sensitive routes and genes related to carbon acquisition and accumulation
Transport Reaction			Fluxes (mmol/gDW h)
N° Rxn	Description	Reaction	CO2 2.5%	CO2 5%	CO2 8%	CO2 10%	Protein Classification	Protein-Gene Association	KEGG Rxn Number
337	3-(4-hydroxyphenyl)pyruvate mitochondrial transport via proton symport	34hpp[c] + h[c] <==> 34hpp[m] + h[m]	0.078621	0.324602	0.570512	0.734466	-	-	-	Transport.in mitochondria
354	Amino acid transporter (L-Alanina). Mitocondrial	ala-L[c] + h[c] <==> ala-L[m] + h[m]	0.0794799	0.328146	0.576741	0.742485	2.A.3.3.3	AOC6 or AOC5	-
360	Asparagine/Na+ symporter. mitochondrial	asn-L[c] + na1[c] <==> asn-L[m] + na1[m] + h[m]	831.779	879.036	926.286	957.789	2.A.18.6.4	AOT7	-
387	Neutral amino acid transporter (glycine). Mitocondrial	gly[c] + na1[c] <==> gly[m] + na1[m]	0.048587	0.200601	0.352571	0.453893	2.A.18.6.4	AOT7	-
413	Dicarboxylate/tricarboxylate carrier (oaa:akg). mitochondrial	oaa[c] + akg[m] <==> oaa[m] + akg[c]	984.3889	987.827	991.27	993.565	2.A.29.2.6	MITC14	-
418	Phosphate carrier. mitochondrial	pi[c] <==> pi[m]	816.729	868.627	920.516	955.112	2.A.29.4.1	MPC1	-
							2.A.29.4.2
2453	Asparagine/H+ symporter. mitochondrial	asn-L[c] + h[c] <==> asn-L[m] + (2) h[m]	831.781	879.036	926.286	957.789	2.A.18.5.2	-	-
2467	ethanol transport to mitochondria (diffusion)	etoh[c] <==> etoh[m]	0.0753341	0.31103	0.546659	0.703758	-	-	-
2487	Dicarboxylate/tricarboxylate carrier (mal:cit). mitochondrial	mal-L[c] + cit[m] <==> mal-L[m] + cit[c]	984.381	987.793	991.21	993.487	2.A.29.2.6	MITC14	-
2496	ammonia transport. mitochondria	nh4[c] + h[c] <==> nh4[m] + h[m]	0.0202029	0.0834086	0.146597	0.188726	-	-	-
2497	O2 transport (diffusion)	o2[c] <==> o2[m]	992.290	994.299	996.312	997.654	-	-	-
2522	Tyrosine permease. mitochondrial	tyr-L[c] + h[c] <==> tyr-L[m] + h[m]	0.0786212	0.324602	0.570512	0.734466	2.A.42.1.1	-	-
							2.A.18.5.2
284	nad transport. Eyespot	nad[h] <==> nad[s]	0.792059	3.76011	6.72731	8.70562	-	-	-	Transport eyespot
2378	nadh transport. Eyespot	nadh[h] <==> nadh[s]	0.792078	3.76011	6.72731	8.70562	-	-	-
2380	nadp transport. Eyespot	nadp[h] <==> nadp[s]	0.792078	3.76011	6.72731	8.70562	-	-	-
220	CO2 transport. extracellular	co2[e] <==> co2[c]	0.47578	2.209	3.9418	5.0971	-	-	-	Transport extra-cellular
230	H2O transport. Extracelular	h2o[e] <==> h2o[c]	0.428889	1.97479	3.5203	4.55073	1.A.8.11.1	MIP1 or MIP2	-
240	ammonia transport. extracellular	nh4[e] + h[e] <==> nh4[c] + h[c]	0.0469891	0.19397	0.340917	0.43889	-	-	-
264	phosphate transport. extracellular	h[e] + pi[e] <==> h[c] + pi[c]	0.0148995	0.0615123	0.108112	0.139182	2.A.1.9.3	PTA3 or PTA4 or PTA1 or PTB5	-
							2.A.20.2.4
107	2-oxoglutarate transport to chloroplast by sodium-ion symport	akg[c] + na1[c] <==> akg[h] + na1[h]	984.3829	987.82	991.256	993.547	-	-	-	Transport. Chloroplast
138	Glucose 1-phosphate:pi antiporter. Chloroplast	g1p[c] + pi[h] <==> g1p[h] + pi[c]	0.0195023	0.121347	0.223162	0.291045	2.A.7.9.2	( ) or ( ) or ( ) or ( ) or ( MOT20 )	-
2285	Neutral amino acid transporter (gly). chloroplast	gly[c] + na1[c] <==> gly[h] + na1[h]	0.0525191	0.216833	0.3811	0.49062	2.A.18.6.4	AOT7	-
2288	H2O transport. Chloroplast	h2o[c] <==> h2o[h]	0.556923	2.0785	3.52433	4.4883	1.A.8.11.1	MIP1 or MIP2	-
2317	pyruvate transport by free diffusion. chloroplast	pyr[c] <==> pyr[h]	984.31792	987.55	990.782	992.936	-	-	-
2332	UDP transport via diffusion. chloroplast	udp[c] <==> udp[h] + h[h]	0.0110394	0.0455744	0.0801003	0.10312	-	-	-
317	ethanol transport via diffusion. glyoxysome	etoh[c] <==> etoh[x]	0.0753376	0.31103	0.546659	0.703758	-	-	-	Transport Glioxysome
Tricarboxylic acid cicle
N° Rxn	Description	Reaction	CO2 2.5%	CO2 5%	CO2 8%	CO2 10%	Protein Classification	Protein-Gene Association	KEGG Rxn Number
2104	Aconitate hydratase. mitochondrial	[m] : cit <==> icit	0.0082843	0.0342026	0.0601137	0.0773892	4.2.1.3	ACH1	R01324
2102	malate dehydrogenase. Mitocondrial (oaa=oxaloacetato)	[m] : h + nadh + oaa <==> mal-L + nad	984.3769	987.793	991.21	993.487	1.1.1.37	MDH3	R00342
2094	citrate synthase. Mitocondrial (coa=Coenzima A)	[m] : accoa + h2o + oaa --> cit + coa + h	0.00828425	0.0342026	0.0601137	0.0773892	2.3.3.1	CIS1	R00351
Metabolism of starch and / or sucrose and / or galactose
N° Rxn	Description	Reaction	CO2 2.5%	CO2 5%	CO2 8%	CO2 10%	Protein Classification	Protein-Gene Association	KEGG Rxn Number
2076	glucose-1-phosphate adenylyltransferase (chloroplast) (adpglc=ADPGlucosa; ppi=difosfato)	[h] : atp + g1p --> adpglc + ppi	0.0337493	0.180169	0.326546	0.42414	2.7.7.27	STA1 y STA6	R00948
2075	UTP---glucose-1-phosphate uridylyltransferase	[c] : utp + g1p + h --> ppi + udpg	0.0188282	0.0777319	0.13662	0.175881	2.7.7.9	UGP1	R00289
	(udpg=UDPGlucosa)
2072	UDP-glucuronate decarboxylase	[c] : udpglcur + h --> udpxyl + co2	0.00758023	0.0312977	0.055008	0.0708162	4.1.1.35	GAD1	R01384
	(udpxyl=UDP-D-xylose)
2073	UDP-glucose 6-dehydrogenase	[c] : udpg + h2o + (2) nad --> udpglcur + (2) nadh + (3) h	0.00758061	0.0312977	0.055008	0.0708162	1.1.1.22	UGD1	R00286
Retinol metabolism
N° Rxn	Description	Reaction	CO2 2.5%	CO2 5%	CO2 8%	CO2 10%	Protein Classification	Protein-Gene Association	KEGG Rxn Number
2018	retinol: NADP oxidoreductase	[s] : retinal + nadph + h <==> retinol + nadp	0.792055	3.76012	6.72731	8.70562	1.1.1.-	-	R08379
2853	retinol:NAD oxidoreductase	[s] : retinal + nadh + h <==> retinol + nad	0.792055	3.76045	6.72731	8.70562	1.1.1.-	-	R02124
Pyruvate metabolism
N° Rxn	Description	Reaction	CO2 2.5%	CO2 5%	CO2 8%	CO2 10%	Protein Classification	Protein-Gene Association	KEGG Rxn Number
1968	Acetyl-CoA C-acetyltransferase	[c] : (2) accoa --> aacoa + coa	0.00566256	0.0233785	0.0410894	0.0528977	2.3.1.9	-	R00238
	(aacoa=aceto-acetil-CoA)
1969	Acetaldehyde dehydrogenase (acetylating)	[c] : acald + coa + nad --> accoa + h + nadh	0.0753364	0	0	0	1.2.1.10	ADH1	R00228
1970	Acetaldehyde dehydrogenase (acetylating). Chloroplast	[h] : acald + coa + nad --> accoa + h + nadh	0.0525187	0.216833	0.3811	0.49062	1.2.1.10	ADH1	R00228
	(acald=acetaldehído)
1973	acetaldehyde-CoA dehydrogenase. Mitocondrial	[m] : accoa + (2) nadh + (2) h --> coa + etoh + (2) nad	0.0753345	0.31103	0.546659	0.703758	1.1.1.1	( ) or ADH1	-
1980	aldehyde dehydrogenase (acetaldehyde. NAD) (ac=acetato)	[c] : acald + h2o + nad --> ac + (2) h + nadh	0	0.31103	0.546659	0.703758	1.2.1.3	-	R00710
1998	phosphotransacetylase. Mitocondrial (actp=acetilfosfato)	[m] : accoa + pi <==> actp + coa	0.4813254	1.41469	2.34778	2.9699	2.3.1.8	PAT1 o PAT2	R00230
2841	aspartate aminotransferase	[c] : akg + asp-L <==> glu-L + oaa	0.0669145	0.276265	0.485557	0.625096	2.6.1.1	AST3 o AST1	R00355
	(akg=2-oxoglutarato; asp-L=L-aspartato; glu-L=L-glutamato; oaa=oxaloacetato
Pyrimidine metabolism
N° Rxn	Description	Reaction	CO2 2.5%	CO2 5%	CO2 8%	CO2 10%	Protein Classification	Protein-Gene Association	KEGG Rxn Number
1910	ATP:UDP phosphotransferase	[c] : atp + udp --> adp + utp	0.0212381	0.0876859	0.154114	0.198404	2.7.4.6	FAP67 or FAP103 or RSP23 or( )	R00156
1915	Cytidine-5'-monophosphate phosphohydrolase (cmp=CMP; cytd=Citidina)	[c] : cmp + h2o --> cytd + pi	0.0282853	0.116789	0.205252	0.264238	3.1.3.5	( ) or ( )	R00511
1944	GTP:cytidine 5'-phosphotransferase	[c] : gtp + cytd --> gdp + cmp + h	0.0282853	0.116792	0.205252	0.264238	2.7.1.48	( ) or ( ) or ( )	R00517
Purine metabolism
N° Rxn	Description	Reaction	CO2 2.5%	CO2 5%	CO2 8%	CO2 10%	Protein Classification	Protein-Gene Association	KEGG Rxn Number
1795	ADP-apyrase	[c] : adp + h2o --> amp + pi + h	0.0181064	0.0747516	0.131382	0.169138	3.6.1.5	-	R00122
2825	Guanosine 3'-diphosphate 5'-triphosphate 5'-phosphohydrolase (ppgpp= Guanosine 3',5'-bis(diphosphate))	[c] : gdptp + h2o <==> ppgpp + pi + (2) h	0.0307472	0.126938	0.223103	0.287218	3.6.1.11	-	R03409
							3.6.1.40
Pentose phosphate pathway
N° Rxn	Description	Reaction	CO2 2.5%	CO2 5%	CO2 8%	CO2 10%	Protein Classification	Protein-Gene Association	KEGG Rxn Number
1663	ribose-5-phosphate isomerase (r5p= alpha-D-Ribose 5-phosphate; ru5p-D= D-Ribulose 5-phosphate)	[h] : r5p <==> ru5p-D	0.1474991	0.690566	1.23349	1.59548	5.3.1.6	RPI1	R01056
2771	D-Ribulose-5-Phosphate 3-Epimerase (xu5p-D= D-Xylulose 5-phosphate)	[h] : ru5p-D <==> xu5p-D	0.3057276	1.42556	2.54508	3.29149	5.1.3.1	RPE1	R01529
Oxidative phosphorylation
N° Rxn	Description	Reaction	CO2 2.5%	CO2 5%	CO2 8%	CO2 10%	Protein Classification	Protein-Gene Association	KEGG Rxn Number
1620	F0F1-ATP synthase Complex V	adp[m] + (3) h[c] + pi[m] --> atp[m] + (2) h[m] + h2o[m]	984.5796	988.634	992.688	995.391	3.6.3.14	ATP2 and ATP3 and ATP4 and ATP5 and ATP6 and ATP12B and ATP15 and CGLD22 and ( ATP1A or ATP1B ) and ( ATP9B or ATP9A )	R00086
Glyoxylate metabolism
N° Rxn	Description	Reaction	CO2 2.5%	CO2 5%	CO2 8%	CO2 10%	Protein Classification	Protein-Gene Association	KEGG Rxn Number
1421	Glycerate kinase (glyc-R=R-glicerato; 3pg= 3-Phospho-D-glycerate)	[c] : atp + glyc-R --> 3pg + adp + h	0.0821687	0.339248	0.596254	0.767606	2.7.1.31	GLYK	R01514
Glycolysis / Gluconeogenesis
N° Rxn	Description	Reaction	CO2 2.5%	CO2 5%	CO2 8%	CO2 10%	Protein Classification	Protein-Gene Association	KEGG Rxn Number
1409	pyruvate kinase (pep= Phosphoenolpyruvate; pyr=piruvato)	[c] : adp + h + pep --> atp + pyr	0.143949	0.594324	1.04457	1.34476	2.7.1.40	PYK1 or PYK5	R00200
2733	phosphoglycerate kinase. Chloroplast (13dpg= 3-Phospho-D-glyceroyl phosphate)	[h] : 13dpg + adp <==> 3pg + atp	0.846054	3.98306	7.11916	9.21007	2.7.2.3	PGK1	R01512
1370	alcohol dehydrogenase (pqqox= PQQ (Pyrroloquinoline-quinone) oxidized form; pqqrd= PQQ (Pyrroloquinoline-quinone) reduced form)	[x] : etoh + pqqox --> acald + pqqrd + h	0.0753337	0.31103	0.546659	0.703758	1.1.99.8	-	R05198
1371	Enolase (2pg= D-Glycerate 2-phosphate;	[c] : 2pg <==> h2o + pep	0.143949	0.594324	1.04457	1.34476	4.2.1.11	PGH1	R00658
1393	phosphoglycerate mutase (3pg=3-Phospho-D-glycerate)	[c] : 3pg <==> 2pg	0.143949	0.594324	1.04457	1.34476	5.4.2.1	PGM2 or ( ) or ( ) or PGM5 or ( ) or PGM1B	R01518
2717	glyceraldehyde 3-phosphate dehydrogenase (NAD) (g3p= D-glyceraldehyde 3-phosphate)	[h] : g3p + nad + pi <==> 13dpg + h + nadh	0.846054	3.98306	7.11916	9.21007	1.2.1.12	GAP3 y GAP1	R01061
2719	Phosphoglucomutase (g1p=D-Glucose 1-phosphate; g6p-A=alpha-D-glucose 6 phosphate)	[c] : g1p <==> g6p-A	0.038329	0.199079	0.359782	0.466927	5.4.2.2	GPM2 o GPM1B	R00959
2721	glucose-6-phosphate isomerase. chloroplast (g6p-A) (f6p-B=beta-D-Fructose 6-phosphate)	[h] : g6p-A <==> f6p-B	0.0390716	0.202144	0.36517	0.473864	5.3.1.9	PGI1	R02740
1375	fructose-bisphosphate aldolase	[h] : fdp-B <==> dhap + g3p	999.655	998.372	997.09	996.235	4.1.2.13	FBA1 or FBA2	R01068
1412	triosephosphate isomerase	[h] : dhap <==> g3p	999.654	998.367	997.081	996.223	5.3.1.1	TPIC	R01015
Metabolism glycine / serine / threonine
N° Rxn	Description	Reaction	CO2 2.5%	CO2 5%	CO2 8%	CO2 10%	Protein Classification	Protein-Gene Association	KEGG Rxn Number
1364	aspartate-semialdehyde dehydrogenase (4pasp=4-Phospho-L-aspartate ; aspsa=L-Aspartate 4-semialdehyde)	[h] : 4pasp + nadph + h --> aspsa + pi + nadp	0.0577521	0.238441	0.419078	0.539513	1.2.1.11	ASSD1	R02291
1365	aspartate kinase	[h] : atp + asp-L --> adp + 4pasp	0.0577521	0.238441	0.419078	0.539513	2.7.2.4	ASK1 or AHD1	R00480
1366	homoserine dehydrogenase	[h] : aspsa + nadph + h --> hom-L + nadp	0.0574893	0.237356	0.417171	0.537058	1.1.1.3	HSD1 or AHD1	R01775
1340	dihydrolipoyl dehydrogenase	[m] : dhlpro + nad --> lpro + nadh + h	0.0248168	0.102461	0.180083	0.231836	1.8.1.4	DLDH1	R03815
1346	glycine dehydrogenase (decarboxylating)	[m] : gly + lpro --> alpro + co2	0.0248168	0.102461	0.180083	0.231836	1.4.4.2	GCSP y GCSH	R03425
1351	homoserine kinase (phom=O-Phospho-L-homoserine)	[h] : atp + hom-L --> adp + phom + h	0.0574893	0.237356	0.417171	0.537058	2.7.1.39	HSK1	R01771
1361	threonine synthase	[h] : phom + h2o --> thr-L + pi	0.0574543	0.237211	0.416917	0.536731	4.2.3.1	THS1	R01466
2706	threonine ammonia-lyase (serine)	[h] : ser-L <==> pyr + nh4	0.0601481	0.248333	0.436464	0.561896	4.3.1.19	THD1	R00220
Glycerolipid metabolism
N° Rxn	Description	Reaction	CO2 2.5%	CO2 5%	CO2 8%	CO2 10%	Protein Classification	Protein-Gene Association	KEGG Rxn Number
1018	digalactosyl-diacylglycerol galactohydrolase (18:1(9Z)/16:0)	[h] : dgdg1819Z160 + h2o --> mgdg1819Z160 + gal	0.00954606	0.0394128	0.069271	0.0891781	3.2.1.22	AGA1	R04470
1034	digalactosyldiacylglycerol synthase (18:1(9Z)/16:0)	[h] : mgdg1819Z160 + udpgal --> dgdg1819Z160 + udp + h	0.0102543	0.0423369	0.0744103	0.0957944	2.4.1.241	DGD1	R04469
2695	alcohol dehydrogenase (glycerol. NADP) (glyald=D-Glyceraldehyde; glyc=Glycerol)	[c] : glyald + nadph + h <==> glyc + nadp	0.0815234	0.336586	0.591575	0.761582	1.1.1.2	LCI28	R01041
Galactose metabolism
N° Rxn	Description	Reaction	CO2 2.5%	CO2 5%	CO2 8%	CO2 10%	Protein Classification	Protein-Gene Association	KEGG Rxn Number
889	UDP-glucose 4-epimerase (udpg=UDP-glucose; udpgal=UDP-galactosa)	[c] : udpg <==> udpgal	0.0110384	0.0455744	0.0801003	0.10312	5.1.3.2	SNE3	R00291
Glutamate metabolism
N° Rxn	Description	Reaction	CO2 2.5%	CO2 5%	CO2 8%	CO2 10%	Protein Classification	Protein-Gene Association	KEGG Rxn Number
892	glutamate---ammonia ligase. cytosol	[c] : atp + glu-L + nh4 --> adp + pi + gln-L + h	0.009229	0.0381038	0.0669702	0.0862162	6.3.1.2	( ) or ( GLN1 )	R00253
Fructose and mannose metabolism
N° Rxn	Description	Reaction	CO2 2.5%	CO2 5%	CO2 8%	CO2 10%	Protein Classification	Protein-Gene Association	KEGG Rxn Number
859	beta-D-Fructose 1.6-bisphosphate 1-phosphohydrolase. Chloroplast (fdp-B=beta-D-Fructose 1,6-bisphosphate; f6p-B=beta-D-Fructose 6-phosphate)	[h] : fdp-B + h2o --> f6p-B + pi	0.344796	1.62771	2.91025	3.76535	3.1.3.11	FBP1	R04780
							3.1.3.37
Carbon fixation
N° Rxn	Description	Reaction	CO2 2.5%	CO2 5%	CO2 8%	CO2 10%	Protein Classification	Protein-Gene Association	KEGG Rxn Number
633	Phosphoribulokinase	[h] : atp + ru5p-D --> adp + h + rb15bp	0.453917	2.11907	3.78373	4.89361	2.7.1.19	PRK1	R01523
634	ribulose-bisphosphate carboxylase (rb15bp=D-Ribulose 1,5-bisphosphate; 3pg=3-Phospho-D-glycerate)	[h] : co2 + h2o + rb15bp --> (2) 3pg + (2) h	0.453917	2.11907	3.78373	4.89361	4.1.1.39	RBCS1 and RBCS2A or RBCS1 and RBCS2B	R00024
Metabolism of amino sugars and nucleotides
N° Rxn	Description	Reaction	CO2 2.5%	CO2 5%	CO2 8%	CO2 10%	Protein Classification	Protein-Gene Association	KEGG Rxn Number
496	UDP-L-arabinose degradation	[c] : udparab + h2o --> arab-L + udp + h	0.00758051	0.0312977	0.055008	0.0708162	3.2.1.55	-	R03078 + R01762
Butanoate metabolism
N° Rxn	Description	Reaction	CO2 2.5%	CO2 5%	CO2 8%	CO2 10%	Protein Classification	Protein-Gene Association	KEGG Rxn Number
616	3-Hydroxybutanoyl-CoA:NADP+ oxidoreductase	[c] : aacoa + nadph + h <==> 3hbcoa + nadp	0.00566242	0.0233785	0.0410894	0.0528977	1.1.1.157	-	R01976
2599	butanoyl-CoA:(acceptor) 2.3-oxidoreductase	[c] : btcoa + nad <==> b2coa + nadh + h	0.00566242	0.0233785	0.0410894	0.0528977	1.3.99.2	-	R01171
Sensitive reactions ( ρ≥0.01) are presented with fluxes (mmol gDW-1 h-1) evaluated at different CO2 conditions. Protein-gene association and KEGG reaction number [1] are also shown for each reaction. More information about genes can be searched in Phytozome or NCBI databases.
