# Supplementary material for: Analysis of Sensitive CO2 Pathways and Genes Related to Carbon Uptake and Accumulation in Chlamydomonas reinhardtii through Genomic Scale Modeling and Experimental Validation
Source: Front Plant Sci. 2016 Feb 9;7:43. doi: 10.3389/fpls.2016.00043 (PMC4746324; doi:10.3389/fpls.2016.00043)
Supplement: Supplementary file 5 [file Table5.XLSX]

## Sheet: Plan1
Supplementary table 5. Sensitive reactions from FBA-analysis with complemented metabolic model
No. Reaction	Reaction	BiGG ID	Description	Default lower bound	Default higher bound	Subsystem	EC number	Gene (transcript)
Flux:(R112)	amp[c] <==> amp[h]	AMPth		-1000	1000	Transport, chloroplast
Flux:(R391)	h2o[c] <==> h2o[m]	H2Otm		-1000	1000	Transport, mitochondria	1.A.8.11.1	( MIP1 (CRv4_Au5.s12.g4049.t1) ) or ( MIP2 (CRv4_Au5.s17.g7269.t1) )
Flux:(R399)	mal-L[c] + akg[m] <==> mal-L[m] + akg[c]	MALAKGtm	Dicarboxylate/tricarboxylate carrier (mal:akg), mitochondrial	-1000	1000	Transport, mitochondria	2.A.29.2.6	MITC14 (CRv4_Au5.s16.g6506.t1)
Flux:(R440)	tyr-L[c] + h[c] <==> tyr-L[m] + h[m]	TYRtm	Tyrosine permease, mitochondrial	-1000	1000	Transport, mitochondria	2.A.42.1.1;2.A.18.5.2	(CRv4_Au5.s13.g4507.t1)
Flux:(R1691)	[m] : 34hpp + glu-L <==> tyr-L + akg	TYRTAm	tyrosine transaminase, mitochondria	-1000	1000	Phenylalanine, tyrosine and tryptophan biosynthesis	2.6.1.1;2.6.1.5;2.6.1.9	( HIS5 (CRv4_Au5.s1.g2264.t1) ) or ( AST3 (CRv4_Au5.s2.g8757.t1) ) or ( AST1 (CRv4_Au5.s2.g9246.t1) ) or ( AST4 (CRv4_Au5.s6.g12556.t1) )
Flux:(R2104)	[m] : cit <==> icit	ACONTm	Aconitate hydratase, mitochondrial	-1000	1000	TCA cycle;CO2 fixation	4.2.1.3	ACH1 (CRv4_Au5.s1.g1822.t1)
Flux:(R2258)	amp[c] <==> amp[h]	AMPth	AMP transport, chloroplast	-1000	1000	Transport, chloroplast
Flux:(R2431)	34hpp[c] + h[c] <==> 34hpp[m] + h[m]	34HPPt2m	3-(4-hydroxyphenyl)pyruvate mitochondrial transport via proton symport	-1000	1000	Transport, mitochondria
Flux:(R2464)	mal-L[c] + succ[m] <==> mal-L[m] + succ[c]	DICtm	dicarboxylate transport, mitochondrial	-1000	1000	Transport, mitochondria
Flux:(R2783)	[c] : 34hpp + glu-L <==> tyr-L + akg	TYRTA	tyrosine transaminase	-1000	1000	Phenylalanine, tyrosine and tryptophan biosynthesis	2.6.1.1;2.6.1.5;2.6.1.9	( HIS5 (CRv4_Au5.s1.g2264.t1) ) or ( AST3 (CRv4_Au5.s2.g8757.t1) ) or ( AST1 (CRv4_Au5.s2.g9246.t1) )
Flux:(R373)	mal-L[c] + succ[m] <==> mal-L[m] + succ[c]	DICtm	dicarboxylate transport, mitochondrial	-1000	1000	Transport, mitochondria
Flux:(R2486)	mal-L[c] + akg[m] <==> mal-L[m] + akg[c]	MALAKGtm	Dicarboxylate/tricarboxylate carrier (mal:akg), mitochondrial	-1000	1000	Transport, mitochondria	2.A.29.2.6	MITC14 (CRv4_Au5.s16.g6506.t1)
Flux:(R3585)	[c] : icit --> caconit + h2o		Citrate cycle	-1000	1000
Flux:(R3587)	[m] : icit --> caconit + h2o		Citrate cycle	-1000	1000
Flux:(R3597)	caconit[m] --> caconit[c]		Citrate cycle	-1000	1000
Flux:(R350)	akg[c] + cit[m] <==> akg[m] + cit[c]	AKGCITtm	Dicarboxylate/tricarboxylate carrier (akg:cit), mitochondrial	-1000	1000	Transport, mitochondria	2.A.29.2.6	MITC14 (CRv4_Au5.s16.g6506.t1)
Flux:(R2089)	[c] : cit <==> icit	ACONT		-1000	1000	TCA cycle	4.2.1.3
Flux:(R437)	thr-L[c] + na1[c] <==> thr-L[m] + na1[m]	THRNA1tm	Neutral amino acid transporter (thr-L), mitochondrial	-1000	1000	Transport, mitochondria	2.A.18.6.4	AOT7 (CRv4_Au5.s2.g9042.t1)
Flux:(R2521)	thr-L[c] + h[c] <==> thr-L[m] + h[m]	THRtm	Amino acid transporter (thr-L), mitochondrial	-1000	1000	Transport, mitochondria	2.A.3.3.3	( AOC6 (CRv4_Au5.s1.g1788.t1) ) or ( AOC5 (CRv4_Au5.s7.g14019.t1) )
Flux:(R2472)	glu-L[c] + na1[c] <==> glu-L[m] + na1[m]	GLUNA1tm	Glutamate:Na+ symporter, mitochondrial	-1000	1000	Transport, mitochondria	2.A.23.2.2	DAT1 (CRv4_Au5.s10.g767.t1)
Flux:(R2785)	[m] : 34hpp + glu-L <==> tyr-L + akg	TYRTAm	tyrosine transaminase, mitochondria	-1000	1000	Phenylalanine, tyrosine and tryptophan biosynthesis	2.6.1.1;2.6.1.5;2.6.1.9	( HIS5 (CRv4_Au5.s1.g2264.t1) ) or ( AST3 (CRv4_Au5.s2.g8757.t1) ) or ( AST1 (CRv4_Au5.s2.g9246.t1) ) or ( AST4 (CRv4_Au5.s6.g12556.t1) )
Flux:(R2880)	[c] : tyr-L + akg <==> 34hpp + glu-L	TAT	L-tyrosine:2-oxoglutarate aminotransferase	-1000	1000	Tyrosine metabolism	2.6.1.1	( AST3 (CRv4_Au5.s2.g8757.t1) ) or ( AST1 (CRv4_Au5.s2.g9246.t1) )
Flux:(R337)	34hpp[c] + h[c] <==> 34hpp[m] + h[m]	34HPPt2m	3-(4-hydroxyphenyl)pyruvate mitochondrial transport via proton symport	-1000	1000	Transport, mitochondria
Flux:(R2522)	tyr-L[c] + h[c] <==> tyr-L[m] + h[m]	TYRtm	Tyrosine permease, mitochondrial	-1000	1000	Transport, mitochondria	2.A.42.1.1;2.A.18.5.2	(CRv4_Au5.s13.g4507.t1)
Flux:(R2873)	[m] : cit <==> icit	ACONTm	Aconitate hydratase, mitochondrial	-1000	1000	TCA cycle;CO2 fixation	4.2.1.3	ACH1 (CRv4_Au5.s1.g1822.t1)
Flux:(R2479)	h2o[c] <==> h2o[m]	H2Otm	H2O transport, mitochondrial	-1000	1000	Transport, mitochondria	1.A.8.11.1	( MIP1 (CRv4_Au5.s12.g4049.t1) ) or ( MIP2 (CRv4_Au5.s17.g7269.t1) )
Flux:(R2480)	h2[c] <==> h2[m]	H2tm	hydrogen transport, mitochondria	-1000	1000	Transport, mitochondria
Flux:(R2149)	[m] : coa + 2mpdhl --> ibcoa + dhlam	DHRT(ibcoa)	dihydrolipoyllysine-residue (2-methylpropanoyl)transferase, Isobutyryl-CoA forming	0	1000	Valine, leucine and isoleucine degradation	2.3.1.168	(CRv4_Au5.s4.g11844.t1)
Flux:(R2165)	[m] : 3mob + thmpp + h --> 2mhop + co2	MOD	3-methyl-2-oxobutanoate dehydrogenase	0	1000	Valine, leucine and isoleucine degradation	1.2.4.4	( (CRv4_Au5.s12.g3863.t1) and (CRv4_Au5.s6.g13618.t1) )
Flux:(R2167)	[m] : 2mhop + lpam --> 2mpdhl + thmpp	MOD(2mhop)	3-methyl-2-oxobutanoate dehydrogenase, 2-Methyl-1-hydroxypropyl-ThPP transforming	0	1000	Valine, leucine and isoleucine degradation	1.2.4.4	( (CRv4_Au5.s12.g3863.t1) and (CRv4_Au5.s6.g13618.t1) )
Flux:(R2850)	[m] : (2) fdxrd <==> (2) fdxox + h2 + (2) h	HYDAm	(FeFe)-hydrogenase, mitochondria	-1000	1000	Pyruvate metabolism;Glyoxylate metabolism	1.12.7.2	( HYDA1 (CRv4_Au5.s3.g11137.t1) and MFDX (CRv4_Au5.s12.g4262.t1) ) or ( HYDA2 (CRv4_Au5.s9.g15404.t1) and MFDX (CRv4_Au5.s12.g4262.t1) )
Flux:(R3097)	[m] : h + co2 + (2) fdxrd + ibcoa --> (2) fdxox + coa + 3mob			-1000	1000	Pyruvate ferredoxin/flavodoxin oxidoreductase	Valine, leucine and isoleucine degradation	g1910.t1	g1910
Flux:(R2607)	[c] : akg + ala-L <==> glu-L + pyr	ALAAT	alanine aminotransferase	-1000	1000	Carbon fixation	2.6.1.2	( AAT1 (CRv4_Au5.s10.g680.t1) ) or ( AAT2 (CRv4_Au5.s6.g13094.t1) )
Flux:(R3836)	[c] : h + nadh + ammo + pyr --> h2o + nad + ala-L		Alanine, aspartate and glutamate metabolism			Alanine dehydrogenase/PNT, C-terminal domain
Flux:(R3141)	[c] : glu-L + (2) fdxox + h2o --> ammo + akg + (2) fdxrd + (2) h	HYDA	(FeFe)-hydrogenase, cytoplasm	-1000	1000	Pyruvate metabolism;Glyoxylate metabolism	1.12.7.2	( HYDA1 (CRv4_Au5.s3.g11137.t1) and (CRv4_Au5.s1.g1092.t1) ) or ( HYDA1 (CRv4_Au5.s3.g11137.t1) and (CRv4_Au5.s12.g2838.t1) ) or ( HYDA1 (CRv4_Au5.s3.g11137.t1) and (CRv4_Au5.s6.g13230.t1) ) or ( HYDA2 (CRv4_Au5.s9.g15404.t1) and (CRv4_Au5.s1.g1092.t1) ) or ( HYDA2 (CRv4_Au5.s9.g15404.t1) and (CRv4_Au5.s12.g2838.t1) ) or ( HYDA2 (CRv4_Au5.s9.g15404.t1) and (CRv4_Au5.s6.g13230.t1) )
Flux:(R2849)	[c] : (2) fdxrd <==> (2) fdxox + h2 + (2) h	HYDA	(FeFe)-hydrogenase, cytoplasm	-1000	1000	Pyruvate metabolism;Glyoxylate metabolism	1.12.7.2	( HYDA1 (CRv4_Au5.s3.g11137.t1) and (CRv4_Au5.s1.g1092.t1) ) or ( HYDA1 (CRv4_Au5.s3.g11137.t1) and (CRv4_Au5.s12.g2838.t1) ) or ( HYDA1 (CRv4_Au5.s3.g11137.t1) and (CRv4_Au5.s6.g13230.t1) ) or ( HYDA2 (CRv4_Au5.s9.g15404.t1) and (CRv4_Au5.s1.g1092.t1) ) or ( HYDA2 (CRv4_Au5.s9.g15404.t1) and (CRv4_Au5.s12.g2838.t1) ) or ( HYDA2 (CRv4_Au5.s9.g15404.t1) and (CRv4_Au5.s6.g13230.t1) )
Flux:(R1415)	[m] : dhlam + nad <==> h + lpam + nadh	PDHe3mr	dihydrolipoamide dehydrogenase (E3), mitochondrial	-1000	1000	Glycolysis / Gluconeogenesis;Valine, leucine and isoleucine degradation	1.8.1.4	DLDH1 (CRv4_Au5.s31.g11386.t1)
Flux:(R2458)	co2[c] <==> co2[m]	CO2tm	CO2 transport, mitochondrial	-1000	1000	Transport, mitochondria
Flux:(R2978)	[m] : h + nadh + co2 + pyr --> nad + Dmala					Isocitrate/isopropylmalate dehydrogenase		Cre02.g143250.t1.2
Flux:(R2982)	[m] : Dmala --> maleiaci + h2o		Butanoate metabolism
Flux:(R2986)	[m] : maleiaci --> fum		Butanoate metabolism
Flux:(R2518)	fum[m] + succ[c] <==> fum[c] + succ[m]	SUCFUMtmr	Succinate/fumarate antiporter, mitochondrial	-1000	1000	Transport, mitochondria	2.A.29.13.1	MITC18 (CRv4_Au5.s6.g12602.t1)
Flux:(R2976)	[c] : h + nadh + co2 + pyr --> nad + Dmala					Isocitrate/isopropylmalate dehydrogenase			Cre07.g325400.t1.2	Cre02.g143250.t1.2
Flux:(R2980)	[c] : Dmala --> maleiaci + h2o		Butanoate metabolism
Flux:(R2984)	[c] : maleiaci --> fum		Butanoate metabolism
Flux:(R2512)	pyr[c] <==> pyr[m]	PYRtm	pyruvate transport by free diffusion, mitochondrial	-1000	1000	Transport, mitochondria
Flux:(R409)	nadh[c] --> nadh[m]	NADHtm	nadh transport, mitochondrial	0	1000	Transport, mitochondria
Flux:(R2495)	nad[c] <==> nad[m]	NADtm	nad transport, mitochondrial	-1000	1000	Transport, mitochondria
Flux:(R220)	co2[e] <==> co2[c]	CO2t	CO2 transport, extracellular	-1000	1000	Transport, extracellular
Flux:(R2203)	[e] : co2 <==>	EX_co2(e)	CO2 exchange	-11.16	1000	Exchange
Flux:(R345)	accoa[c] + coa[m] <==> accoa[m] + coa[c]	ACCOAtm	Acetyl-CoA:CoA antiporter, mitochondrial	-1000	1000	Transport, mitochondria	2.A.1.25.1	FBB13 (CRv4_Au5.s7.g14228.t1)
Flux:(R4166)	[c] : penicillin + akg + o2 --> deacephac + succ + co2 + h2o		Penicillin and cephalosporin biosynthesis
Flux:(R4168)	[c] : deacephac + succ + co2 + h2o --> penicillin + akg + o2		Penicillin and cephalosporin biosynthesis
Flux:(R47)	[e] : for <==>	EX_for(e)	Formate exchange	0	1000	Exchange
Flux:(R226)	for[c] + h[c] --> for[e] + h[e]	FORti	formate transport out via proton symport	0	1000	Transport, extracellular	2.A.44.2.1	( NAR1.6 (CRv4_Au5.s1.g1213.t1) ) or ( NAR1.3 (CRv4_Au5.s3.g11354.t1) ) or ( NAR1.4 (CRv4_Au5.s7.g14150.t1) )
Flux:(R12)	[e] : h <==>	EX_h(e)	H+ exchange	-10	1000	Exchange
Flux:(R2286)	gly[c] + h[c] <==> gly[h] + h[h]	GLYth	Amino acid transporter (gly), chloroplast	-1000	1000	Transport, chloroplast	2.A.3.3.3	( AOC6 (CRv4_Au5.s1.g1788.t1) ) or ( AOC5 (CRv4_Au5.s7.g14019.t1) )
Flux:(R1968)	[c] : (2) accoa --> aacoa + coa	ACACT	Acetyl-CoA C-acetyltransferase	0	1000	Pyruvate metabolism	2.3.1.9	(CRv4_Au5.s2.g9723.t1)
Flux:(R68)	[x] : bhb -->	DM_bhb(x)		0	1000	Demand
Flux:(R307)	h[c] + nadh[c] <==> h[x] + nadh[x]	NADH(h)tx	NADH transport, glyoxysome	-1000	1000	Transport, glyoxysome
Flux:(R313)	acac[c] <==> acac[x]	ACACtx	Acetoacetate transport via diffusion, glyoxysome	-1000	1000	Transport, glyoxysome
Flux:(R620)	[x] : bhb + nad <==> acac + nadh + h	HBNOx	3-Hydroxybutanoate:NAD+ oxidoreductase, glyoxysome	-1000	1000	Butanoate metabolism	1.1.1.30	(CRv4_Au5.s7.g14479.t1)
Flux:(R2402)	nad[x] <==> nad[c]	NADtx	nad transport, glycosomal	-1000	1000	Transport, glyoxysome
Flux:(R3361)	[c] : aacoa + ac --> acac + accoa					Propanoate metabolism
Flux:(R380)	for[m] + h[m] --> for[c] + h[c]	FORtmi	formate transport out via proton symport, mitochondrial	0	1000	Transport, mitochondria	2.A.44.2.1	( NAR1.6 (CRv4_Au5.s1.g1213.t1) ) or ( NAR1.3 (CRv4_Au5.s3.g11354.t1) ) or ( NAR1.4 (CRv4_Au5.s7.g14150.t1) )
Flux:(R1995)	[m] : coa + pyr --> accoa + for	PFLACTm	Formate C-acetyltransferase, mitochondrial	0	1000	Pyruvate metabolism	2.3.1.54	PFL1 (CRv4_Au5.s1.g1862.t1)
Flux:(R4077)	[c] : nadp + tryp --> h + nadph + in3acede					Tryptophan metabolism
Flux:(R4073)	[c] : nad + tryp --> h + nadh + in3acede
Flux:(R118)	co2[c] --> co2[h]	CO2th	CO2 chloroplast transport	0	1000	Transport, chloroplast
Flux:(R150)	gly[c] + na1[c] <==> gly[h] + na1[h]	GLYNA1th	Neutral amino acid transporter (gly), chloroplast	-1000	1000	Transport, chloroplast	2.A.18.6.4	AOT7 (CRv4_Au5.s2.g9042.t1)
Flux:(R2106)	[c] : icit + nadp <==> akg + co2 + nadph	ICDH	isocitrate dehydrogenase (NADP)	-1000	1000	TCA cycle;CO2 fixation	1.1.1.42	IDH3 (CRv4_Au5.s4.g11563.t1)
Flux:(R2877)	[m] : atp + coa + succ + h <==> adp + pi + succoa
Flux:(R2109)	[m] : succ + q8 <==> fum + q8h2	SUCDH(q8)m	succinate dehydrogenase (ubiquinone)	-1000	1000	TCA cycle;Oxidative phosphorylation	1.3.5.1	( SDH1 (CRv4_Au5.s14.g5444.t1) and SDH2 (CRv4_Au5.s6.g12681.t1) )
Flux:(R1626)	[m] : h + nadh + q8 --> nad + q8h2	NADHOR	NADH:ubiquinone oxidoreductase Complex I	0	1000	Oxidative phosphorylation	1.6.5.3	NDA2 (CRv4_Au5.s33.g11431.t1) or NDA3 (CRv4_Au5.s5.g11988.t1) or ( NUO10 (CRv4_Au5.s12.g2920.t1) and NUO11 (CRv4_Au5.s2.g9603.t1) and NUO13 (CRv4_Au5.s22.g9803.t1) and NUO21 (CRv4_Au5.s6.g12740.t1) and NUO3 (CRv4_Au5.s8.g15041.t1) and NUO5 (CRv4_Au5.s10.g647.t1) and NUO6 (CRv4_Au5.s10.g104.t1) and NUO8 (CRv4_Au5.s12.g3008.t1) and NUO9 (CRv4_Au5.s7.g13986.t1) and NUOA8 (CRv4_Au5.s7.g14116.t1) and …
Flux:(R3577)	[m] : oaa + ac --> cit			0	1000
Flux:(R105)	ac[c] <==> ac[h]	ACth	acetate transport, chloroplast	-1000	1000	Transport, chloroplast
Flux:(R2839)	[h] : ac + atp <==> actp + adp	ACKrh	acetate kinase, chloroplast	-1000	1000	Pyruvate metabolism	2.7.2.1	( ACK2 (CRv4_Au5.s17.g7241.t1) ) or ( ACK1 (CRv4_Au5.s9.g15407.t1) )	( CRv4_Au5.s17.g7241.t1 or CRv4_Au5.s9.g15407.t1 )	( ACK2 ) or ( ACK1 )	Chloroplast
Flux:(R2840)	[m] : ac + atp <==> actp + adp
Flux:(R2847)	[m] : accoa + pi <==> actp + coa	PTArm	phosphotransacetylase, mitochondrial	-1000	1000	Pyruvate metabolism	2.3.1.8	( PAT1 (CRv4_Au5.s17.g7027.t1) ) or ( PAT2 (CRv4_Au5.s9.g15405.t1) )	( CRv4_Au5.s17.g7027.t1 or CRv4_Au5.s9.g15405.t1 )	( PAT1 ) or ( PAT2 )	Mitochondria
Flux:(R2259)	asp-L[c] + na1[c] <==> asp-L[h] + na1[h]	ASPNA1th	Aspartate:Na+ symporter, chloroplast	-1000	1000	Transport, chloroplast	2.A.23.2.2	DAT1 (CRv4_Au5.s10.g767.t1)
Flux:(R2254)	akg[c] + mal-L[h] <==> akg[h] + mal-L[c]	AKGMALth	aKG/malate antiport	-1000	1000	Transport, chloroplast	2.A.47.3.1	OMT1 (CRv4_Au5.s17.g7311.t1)
Flux:(R2298)	mal-L[c] + na1[c] <==> mal-L[h] + na1[h]	MAL(na)th	L-malate transport to chloroplast by sodium-ion symport	-1000	1000	Transport, chloroplast
Flux:(R487)	[h] : akg + asp-L <==> glu-L + oaa	ASPATh	aspartate aminotransferase, chloroplast	-1000	1000	Alanine and aspartate metabolism;Glycine, serine and threonine metabolism	2.6.1.1	( AST3 (CRv4_Au5.s2.g8757.t1) ) or ( AST1 (CRv4_Au5.s2.g9246.t1) )
Flux:(R637)	[h] : mal-L + nadp <==> co2 + nadph + pyr	MDHC(nadp)hr	malate dehydrogenase (oxaloacetate decarboxylating) (NADP+)	-1000	1000	Carbon fixation;Pyruvate metabolism	1.1.1.40	( MME3 (CRv4_Au5.s14.g5651.t1) ) or ( MME2 (CRv4_Au5.s14.g5652.t1) ) or ( MME6 (CRv4_Au5.s6.g12423.t1) )
Flux:(R146)	glu-L[h] + h[h] --> glu-L[c] + h[c]	GLUth	Amino acid transporter (glu-L), chloroplast	0	1000	Transport, chloroplast	2.A.18.6.6	AOT5 (CRv4_Au5.s6.g12686.t1)
Flux:(R629)	[h] : h + nadph + oaa --> mal-L + nadp	MDH(nadp)hi	malate dehydrogenase (NADP+)	0	1000	Carbon fixation	1.1.1.82	MDH5 (CRv4_Au5.s9.g15688.t1)
Flux:(R2610)	[m] : akg + asp-L <==> glu-L + oaa	ASPATm	aspartate aminotransferase, mitochondrial	-1000	1000	Carbon fixation;Glutamate metabolism;Alanine and aspartate metabolism	2.6.1.1	( AST3 (CRv4_Au5.s2.g8757.t1) ) or ( AST1 (CRv4_Au5.s2.g9246.t1) ) or ( AST4 (CRv4_Au5.s6.g12556.t1) )	( CRv4_Au5.s2.g8757.t1 or CRv4_Au5.s2.g9246.t1 or CRv4_Au5.s6.g12556.t1 )	( AST3 ) or ( AST1 ) or ( AST4 )
Flux:(R362)	asp-L[c] + na1[c] <==> asp-L[m] + na1[m]	ASPNA1tm	Aspartate:Na+ symporter, mitochondrial	-1000	1000	Transport, mitochondria	2.A.23.2.2	DAT1 (CRv4_Au5.s10.g767.t1)
Flux:(R2866)	[m] : coa + sdhlam + h <==> dhlam + succoa	AKGDHe2r	2-oxoglutarate dehydrogenase E2 component	-1000	1000	TCA cycle	2.3.1.61
Flux:(R2092)	[m] : akg + h + lpam --> co2 + sdhlam	AKGDHmi	2-oxoglutarate dehydrogenase E1 component	0	1000	TCA cycle	1.2.4.2	OGD1 (CRv4_Au5.s12.g3808.t1)
Flux:(R2770)	[h] : g3p + s7p <==> e4p + f6p-B	TAh	transaldolase	-1000	1000	Pentose phosphate pathway	2.2.1.2	TAL1 (CRv4_Au5.s1.g1622.t1)
Flux:(R2459)	coa[c] <==> coa[m]	COAtm	CoA transporter	-1000	1000	Transport, mitochondria
Flux:(R2250)	accoa[c] + coa[h] <==> accoa[h] + coa[c]	ACCOAth	Acetyl-CoA:CoA antiporter, chloroplast	-1000	1000	Transport, chloroplast	2.A.1.25.1	FBB13 (CRv4_Au5.s7.g14228.t1)
Flux:(R1997)	[h] : accoa + pi <==> actp + coa	PTArh	phosphotransacetylase	-1000	1000	Pyruvate metabolism	2.3.1.8	( PAT1 (CRv4_Au5.s17.g7027.t1) ) or ( PAT2 (CRv4_Au5.s9.g15405.t1) )
Flux:(R2475)	gly[c] + na1[c] <==> gly[m] + na1[m]	GLYNA1tm	Neutral amino acid transporter (gly), mitochondrial	-1000	1000	Transport, mitochondria	2.A.18.6.4	AOT7 (CRv4_Au5.s2.g9042.t1)
Flux:(R1398)	[h] : pyr + thmpp + h --> 2ahethmpp + co2	PDHam1hi	pyruvate dehydrogenase (acetyl-transferring)	0	1000	Glycolysis / Gluconeogenesis;Alanine and aspartate metabolism	1.2.4.1;2.2.1.6;4.1.1.1	( PDC2 (CRv4_Au5.s2.g8797.t1) and PDH2 (CRv4_Au5.s3.g11028.t1) ) or ( ALSS1 (CRv4_Au5.s23.g9893.t1) and ALSL1 (CRv4_Au5.s29.g10106.t1) )
Flux:(R1413)	[h] : 2ahethmpp --> acald + thmpp	PDCh	Pyruvate decarboxylase, chloroplast	0	1000	Glycolysis / Gluconeogenesis;Pyruvate metabolism	4.1.1.1
Flux:(R1359)	[h] : thr-L <==> gly + acald	THRA	threonine aldolase	-1000	1000	Glycine, serine and threonine metabolism	4.1.2.5	(CRv4_Au5.s10.g124.t2)
Flux:(R136)	for[h] + h[h] --> for[c] + h[c]	FORthi	formate transport out via proton symport, chloroplast	0	1000	Transport, chloroplast	2.A.44.2.1	( NAR1.5 (CRv4_Au5.s12.g3889.t1) ) or ( NAR1.2 (CRv4_Au5.s6.g13574.t1) ) or ( NAR1.1 (CRv4_Au5.s9.g15694.t1) )
Flux:(R1775)	[h] : 2obut + coa --> ppcoa + for	PCFPTh	propanoyl-CoA:formate C-propanoyltransferase, chloroplast	0	1000	Propanoate metabolism	2.3.1.54	PFL1 (CRv4_Au5.s1.g1862.t1)
Flux:(R2143)	[h] : thr-L --> 2obut + nh4	TAL	threonine ammonia-lyase	0	1000	Valine, leucine and isoleucine biosynthesis	4.3.1.19	THD1 (CRv4_Au5.s2.g8272.t1)
Flux:(R2314)	ppcoa[c] <==> ppcoa[h]	PPCOAth	propanoyl-CoA transport, chloroplast	-1000	1000	Transport, chloroplast
Flux:(R2263)	coa[c] <==> coa[h]	COAth	CoA transporter, chloroplast	-1000	1000	Transport, chloroplast
Flux:(R2509)	ppcoa[c] <==> ppcoa[m]	PPCOAtm	propanoyl-CoA transport, mitochondria	-1000	1000	Transport, mitochondria
Flux:(R3218)	[m] : oaa + ppcoa --> pyr + smetmalocoa		Propanoate metabolism	0	1000	PYC1		Cre06.g258700.t1.3
Flux:(R4048)	[m] : smetmalocoa --> rmetmacoa		Valine, leucine and isoleucine degradation	-1000	1000			Cre10.g466500.t1.2
Flux:(R3734)	[m] : succoa --> rmetmacoa			-1000	1000
Flux:(R336)	2pg[c] <==> 2pg[m]	2PGtm	glycerate transport, mitochondria	-1000	1000	Transport, mitochondria
Flux:(R1411)	[m] : adp + h + pep --> atp + pyr	PYKm	pyruvate kinase, mitochondrial	0	1000	Glycolysis / Gluconeogenesis;Carbon fixation	2.7.1.40	( PYK1 (CRv4_Au5.s12.g3734.t1) ) or ( PYK5 (CRv4_Au5.s2.g9759.t1) )
Flux:(R2710)	[m] : 2pg <==> h2o + pep	ENOm	enolase, mitochondria	-1000	1000	Glycolysis / Gluconeogenesis	4.2.1.11	PGH1 (CRv4_Au5.s12.g3334.t1)
Flux:(R2504)	pi[c] + na1[c] <==> pi[m] + na1[m]	PINA1tm	Pi:Na+ symporter, mitochondrial	-1000	1000	Transport, mitochondria	2.A.20.2.1;2.A.20.2.3	( PTB8 (CRv4_Au5.s1.g2299.t1) ) or ( PTB7 (CRv4_Au5.s12.g2868.t1) ) or ( PTB1 (CRv4_Au5.s12.g2906.t1) ) or ( PTB12 (CRv4_Au5.s2.g9693.t1) ) or ( PTB4 (CRv4_Au5.s2.g9695.t1) ) or ( PTB3 (CRv4_Au5.s26.g9996.t1) ) or ( PTB2 (CRv4_Au5.s26.g9997.t1) )
Flux:(R3060)	[h] : fdxrd + nad --> fdxox + nadh + h		Pyridine nucleotide-disulphide oxidoreductase, dimerisation domain	0	1000	Cre06.g271200.t1.2	Cre17.g712100.t1.2
Flux:(R3229)	[h] : s7p + g3p --> e4p + dfruc6phos		Transaldolase	0	1000	Cre01.g032650.t1.2	Cre01.g032650.t2.1 (primary)
Flux:(R3231)	[h] : dfruc6phos + pi --> actp + e4p + h2o			0	1000
Flux:(R116)	adp[c] + atp[h] + (3) h[c] --> adp[h] + atp[c] + (3) h[h]	ATP(3h)th	ADP/ATP transporter, chloroplast	0	1000	Transport, chloroplast	2.A.12.1.2	( AAA3 (CRv4_Au5.s17.g7006.t1) ) or ( AAA1 (CRv4_Au5.s41.g11876.t1) )
Flux:(R2439)	ac[c] <==> ac[m]	ACtm	acetate transport, mitochondrial	-1000	1000	Transport, mitochondria
Flux:(R98)	3pg[c] + pi[h] <==> 3pg[h] + pi[c]	3PG(pi)thr	3-Phospho-D-glycerate transport via triose phosphate translocator (from chloroplast)	-1000	1000	Transport, chloroplast	2.A.7.9.1;2.A.7.9.2	( (CRv4_Au5.s14.g5515.t1) ) or ( (CRv4_Au5.s15.g5921.t1) ) or ( (CRv4_Au5.s2.g8924.t1) ) or ( (CRv4_Au5.s8.g14736.t1) ) or ( MOT20 (CRv4_Au5.s9.g15789.t1) )
Flux:(R2717)	[h] : g3p + nad + pi <==> 13dpg + h + nadh	GAPDHh	glyceraldehyde 3-phosphate dehydrogenase (NAD)	-1000	1000	Glycolysis / Gluconeogenesis	1.2.1.12	( GAP3 (CRv4_Au5.s1.g1191.t1) and GAP1 (CRv4_Au5.s12.g2782.t1) )
Flux:(R2724)	[c] : 3pg <==> 2pg	PGM	phosphoglycerate mutase	-1000	1000	Glycolysis / Gluconeogenesis	5.4.2.1	( PGM2 (CRv4_Au5.s10.g840.t1) ) or ( (CRv4_Au5.s12.g3446.t1) ) or ( (CRv4_Au5.s12.g3612.t1) ) or ( PGM5 (CRv4_Au5.s3.g10489.t1) ) or ( (CRv4_Au5.s3.g10792.t1) ) or ( PGM1B (CRv4_Au5.s6.g12839.t2) )
Flux:(R2733)	[h] : 13dpg + adp <==> 3pg + atp	PGKh	phosphoglycerate kinase, chloroplast	-1000	1000	Glycolysis / Gluconeogenesis;Carbon fixation	2.7.2.3	PGK1 (CRv4_Au5.s22.g9800.t1)
Flux:(R153)	h2o[c] <==> h2o[h]	H2Oth	H2O transport, chloroplast	-1000	1000	Transport, chloroplast	1.A.8.11.1	( MIP1 (CRv4_Au5.s12.g4049.t1) ) or ( MIP2 (CRv4_Au5.s17.g7269.t1) )
Flux:(R1624)	[h] : h2o + ppi --> (2) pi	IDPh	Inorganic diphosphatase	0	1000	Oxidative phosphorylation	3.6.1.1	( IPY1 (CRv4_Au5.s10.g135.t1) ) or ( IPY3 (CRv4_Au5.s2.g9250.t1) ) or ( (CRv4_Au5.s2.g9408.t1) )
Flux:(R1412)	[h] : dhap <==> g3p	TPIh	triosephosphate isomerase	-1000	1000	Glycolysis / Gluconeogenesis;Carbon fixation	5.3.1.1	TPIC (CRv4_Au5.s1.g1557.t1)
Flux:(R2712)	[h] : fdp-B <==> dhap + g3p	FBAh	fructose-bisphosphate aldolase	-1000	1000	Glycolysis / Gluconeogenesis	4.1.2.13	( FBA1 (CRv4_Au5.s1.g1108.t1) ) or ( FBA2 (CRv4_Au5.s2.g8669.t1) )
Flux:(R3322)	[h] : ppi + f6p-B --> pi + fdp-B		Fructose and mannose metabolism	0	1000			Cre12.g553250.t1.2	PFK2
Flux:(1665)	[h] : e4p + xu5p-D <==> f6p-B + g3p	TKT2h	transketolase 2	-1000	1000	Pentose phosphate pathway;Carbon fixation	2.2.1.1	TRK1 (CRv4_Au5.s2.g8409.t1)
Flux:(1360)	[h] : ser-L <==> pyr + nh4	THRAL	threonine ammonia-lyase (serine)	-1000	1000	Glycine, serine and threonine metabolism	4.3.1.19	THD1 (CRv4_Au5.s2.g8272.t1)
Flux:(2320)	ser-L[c] + na1[c] <==> ser-L[h] + na1[h]	SERNA1th	Neutral amino acid transporter (ser-L), chloroplast	-1000	1000	Transport, chloroplast	2.A.18.6.4	AOT7 (CRv4_Au5.s2.g9042.t1)
Flux:(430)	ser-L[c] + na1[c] <==> ser-L[m] + na1[m]	SERNA1tm	Neutral amino acid transporter (ser-L), mitochondrial	-1000	1000	Transport, mitochondria	2.A.18.6.4	AOT7 (CRv4_Au5.s2.g9042.t1)
Flux:(177)	nh4[c] + h[c] <==> nh4[h] + h[h]	NH4th	ammonia transport, chloroplast	-1000	1000	Transport, chloroplast
Flux:(2700)	[m] : mlthf + gly + h2o <==> thf + ser-L	GHMT	glycine hydroxymethyltransferase	-1000	1000	Glycine, serine and threonine metabolism	2.1.2.1	SHMT3 (CRv4_Au5.s9.g15712.t1)
Flux:(411)	nh4[c] + h[c] <==> nh4[m] + h[m]	NH4tm	ammonia transport, mitochondria	-1000	1000	Transport, mitochondria
Flux:(1570)	[m] : mlthf + nh4 + co2 + nadh --> gly + thf + nad	GLYS	glycine synthase	0	1000	Nitrogen metabolism	2.1.2.10	( IBA57 (CRv4_Au5.s10.g816.t1) and CGL77 (CRv4_Au5.s12.g4121.t1) ) or ( IBA57 (CRv4_Au5.s10.g816.t1) and GCST (CRv4_Au5.s3.g11019.t1) )
Flux:(154)	h2[c] <==> h2[h]	H2th	hydrogen transport, chloroplast	-1000	1000	Transport, chloroplast
Flux:(2001)	[h] : (2) fdxrd <==> (2) fdxox + h2 + (2) h	HYDAh	(FeFe)-hydrogenase, chloroplast	-1000	1000	Pyruvate metabolism;Glyoxylate metabolism	1.12.7.2	( HYDA1 (CRv4_Au5.s3.g11137.t1) and FDX2 (CRv4_Au5.s16.g6229.t1) ) or ( HYDA1 (CRv4_Au5.s3.g11137.t1) and FDX5 (CRv4_Au5.s17.g7064.t1) ) or ( HYDA1 (CRv4_Au5.s3.g11137.t1) and FDX6 (CRv4_Au5.s3.g10824.t1) ) or ( HYDA1 (CRv4_Au5.s3.g11137.t1) and FDX3 (CRv4_Au5.s6.g13523.t1) ) or ( HYDA1 (CRv4_Au5.s3.g11137.t1) and FDX4 (CRv4_Au5.s7.g14133.t1) ) or ( HYDA2 (CRv4_Au5.s9.g15404.t1) and FDX2 (CRv4_Au…
Flux:(2773)	[h] : r5p + xu5p-D <==> g3p + s7p	TKT1h	transketolase 1	-1000	1000	Pentose phosphate pathway;Carbon fixation	2.2.1.1	TRK1 (CRv4_Au5.s2.g8409.t1)
Flux:(1662)	[h] : ru5p-D <==> xu5p-D	RPEh	D-Ribulose-5-Phosphate 3-Epimerase	-1000	1000	Pentose phosphate pathway;Carbon fixation	5.1.3.1	RPE1 (CRv4_Au5.s12.g3309.t1)
Flux:(1663)	[h] : r5p <==> ru5p-D	RPIh	ribose-5-phosphate isomerase	-1000	1000	Pentose phosphate pathway;Carbon fixation	5.3.1.6	RPI1 (CRv4_Au5.s3.g10896.t1)
Flux:(3636)	[c] : ala-L --> ala-D			-1000	1000
Flux:(3640)	[m] : ala-D --> ala-L			-1000	1000
Flux:(3665)	[c]: glu-D --> glu-L			-1000	1000
Flux:(3919)	[c] : akg + ala-D --> glu-D + pyr		D-Alanine metabolism	-1000	1000	Cre10.g458050.t1.2		BCA3
Flux:(3921)	[m] : akg + ala-D --> glu-D + pyr		D-Alanine metabolism	-1000	1000	Cre10.g458050.t1.2		BCA3
Flux:(3020)	[c] : h2 + nad --> nadh + h			0	1000
Flux:(140)	g6p-A[c] + pi[h] <==> g6p-A[h] + pi[c]	G6PA(pi)th	alpha-glucose 6-phosphate:pi antiporter, chloroplast	-1000	1000	Transport, chloroplast	2.A.7.9.2	( (CRv4_Au5.s14.g5515.t1) ) or ( (CRv4_Au5.s15.g5921.t1) ) or ( (CRv4_Au5.s2.g8924.t1) ) or ( (CRv4_Au5.s8.g14736.t1) ) or ( MOT20 (CRv4_Au5.s9.g15789.t1) )
Flux:(1390)	[h] : g6p-A <==> f6p-B	PGIAh	glucose-6-phosphate isomerase, chloroplast (g6p-A)	-1000	1000	Glycolysis / Gluconeogenesis	5.3.1.9	PGI1 (CRv4_Au5.s3.g10657.t3)
Flux:(1388)	[c] : g1p <==> g6p-A	PGCM	phosphoglucomutase	-1000	1000	Glycolysis / Gluconeogenesis	5.4.2.2	( GPM2 (CRv4_Au5.s1.g1224.t1) ) or ( GPM1B (CRv4_Au5.s13.g5035.t2) )
Flux:(612)	[c] : 3hbcoa <==> b2coa + h2o	HBCHL	3-Hydroxybutanoyl-CoA hydro-lyase	-1000	1000	Butanoate metabolism	4.2.1.17;5.3.3.8	( (CRv4_Au5.s16.g6952.t1) ) or ( (CRv4_Au5.s2.g8635.t1) )
Flux:(2445)	ala-L[c] + na1[c] <==> ala-L[m] + na1[m]	ALANA1tm	Neutral amino acid transporter (ala-L), mitochondrial	-1000	1000	Transport, mitochondria	2.A.18.6.4	AOT7 (CRv4_Au5.s2.g9042.t1)
Flux:(2603)	[c] : aacoa + nadph + h <==> 3hbcoa + nadp	HBCO(nadp)	3-Hydroxybutanoyl-CoA:NADP+ oxidoreductase	-1000	1000	Butanoate metabolism	1.1.1.157	(CRv4_Au5.s12.g3750.t1)
Flux:(3257)	[c] : sucr + pi --> dfruct + g1p		Starch and sucrose metabolism
Flux:(3890)	[c] : udpg + dfructo --> udp + sucr		Starch and sucrose metabolism					Cre12.g524000.t1.2
Flux:(4027)	[c] : ammo --> fum + asp-L		Alanine, aspartate and glutamate metabolism					Cre08.g385400.t1.2
Flux:(2305)	nadp[c] <==> nadp[h]	NADPth	NADP transport by free diffusion, chloroplast		1000	Transport, chloroplast
Flux:(175)	nadp[c] <==> nadp[h]	NADPth	NADP transport by free diffusion, chloroplast	-1000	1000	Transport, chloroplast
